1 **Title**

2 Novel epigenetic clock for fetal brain development predicts fetal epigenetic age for iPSCs and iPSC-  
3 derived neurons.

4 **Authors**

5 Leonard C. Steg<sup>1</sup>, Gemma L. Shireby<sup>1</sup>, Jennifer Imm<sup>1</sup>, Jonathan P. Davies<sup>1</sup>, Robert Flynn<sup>1</sup>, Seema C.  
6 Namboori<sup>1</sup>, Akshay Bhinge<sup>1</sup>, Aaron R. Jeffries<sup>1</sup>, Joe Burrage<sup>1</sup>, Grant W. A. Neilson<sup>1</sup>, Emma M. Walker<sup>1</sup>,  
7 Leo W. Perfect<sup>2</sup>, Jack Price<sup>2</sup>, Nicholas J. Bray<sup>3</sup>, Emma L. Cope<sup>4</sup>, Kimberly M. Jones<sup>4</sup>, Nicholas D. Allen<sup>4</sup>,  
8 Ehsan Pishva<sup>1,5</sup>, Jonathan Mill<sup>1</sup>, Katie Lunnon<sup>1</sup> & Eilis Hannon<sup>1,\*</sup>

9 <sup>1</sup> University of Exeter Medical School, College of Medicine and Health, University of Exeter, Exeter, UK.

10 <sup>2</sup> Department of Basic and Clinical Neuroscience, Institute of Psychiatry, Psychology and Neuroscience,  
11 King's College London, UK.

12 <sup>3</sup> Division of Psychological Medicine and Clinical Neurosciences, School of Medicine, Cardiff University,  
13 Cardiff, UK.

14 <sup>4</sup> School of Biosciences, Cardiff University, Cardiff, UK.

15 <sup>5</sup> Department of Psychiatry and Neuropsychology, School for Mental Health and Neuroscience  
16 (MHeNS), Maastricht University, Maastricht, The Netherlands.

17 \* Corresponding author: Eilis Hannon, University of Exeter Medical School, RILD Building Level 3, Royal  
18 Devon and Exeter Hospital, Barrack Rd, Exeter. EX2 5DW. UK. E-mail: [ej.hannon@exeter.ac.uk](mailto:ej.hannon@exeter.ac.uk)

19 **Keywords**

20 Epigenetic clock, DNA methylation, fetal neurodevelopment, induced pluripotent stem cells, iPSC-  
21 derived neurons, neuronal precursor cells, DNAm clock

## 1 **Abstract**

2 Induced pluripotent stem cells (iPSCs) and their differentiated neurons (iPSC-neurons) are a widely  
3 used cellular model in the research of the central nervous system. However, it is unknown how well  
4 they capture age-associated processes, particularly given that pluripotent cells are only present during  
5 the early stages of mammalian development. Epigenetic clocks utilize coordinated age-associated  
6 changes in DNA methylation to make predictions that correlate strongly with chronological age, and  
7 it has been shown that the induction of pluripotency rejuvenates predicted epigenetic age. As existing  
8 clocks are not optimized for the study of brain development, to investigate more precisely the  
9 epigenetic age of iPSCs and iPSC-neurons, here, we establish the fetal brain clock (FBC), a bespoke  
10 epigenetic clock trained in prenatal neurodevelopmental samples. Our data show that the FBC  
11 outperforms other established epigenetic clocks in predicting the age of fetal brain samples. We then  
12 applied the FBC to DNA methylation data of cellular datasets that have profiled iPSCs and iPSC-derived  
13 neuronal precursor cells and neurons and find that these cell types are characterized by a fetal  
14 epigenetic age. Furthermore, while differentiation from iPSCs to neurons significantly increases the  
15 epigenetic age, iPSC-neurons are still predicted as having fetal epigenetic age. Together our findings  
16 reiterate the need for better understanding of the limitations of existing epigenetic clocks for  
17 answering biological research questions and highlight a potential limitation of iPSC-neurons as a  
18 cellular model for the research of age-related diseases as they might not fully recapitulate an aged  
19 phenotype.

## 20 **MAIN TEXT**

### 21 **Introduction**

22 Induced pluripotent stem cells (iPSCs) offer a unique cellular system to investigate disease in human-  
23 derived cells. iPSCs are obtained by taking tissue samples (e.g. skin or blood) from patients and treating  
24 the cells with a set of core pluripotency transcription factors that reprogram the cells to a pluripotent  
25 state [1]. Established iPSC lines have the capacity to be further differentiated into any cell type,

1 including neurons, when treated with the appropriate factors [2–4]. This is of particular interest for  
2 neuroscience, as the only alternative cellular model for human neurons are immortalized cell lines.  
3 However, as immortalized cell lines retain some physiological properties of the cancerous cells they  
4 were derived from, (for example undergoing an infinite number of cell divisions) [5] they do not purely  
5 represent the neuronal phenotype. iPSC-derived neurons (iPSC-neurons), on the other hand, express  
6 appropriate morphological and neurophysiological properties of neurons and subject to different  
7 protocols can be differentiated into a wide range of specific neuronal subtypes [6]. iPSCs and their  
8 neuronal derivatives have been widely used to research disorders of the central nervous system,  
9 including developmental disorders such as autism and schizophrenia and age-related diseases such as  
10 Alzheimer’s disease (AD) or Parkinson’s disease. However, it is unknown how well iPSCs and especially  
11 iPSC-neurons capture age-associated processes, which are fundamental to the study of age-related  
12 diseases. Of specific relevance is the fact that pluripotent cells only occur during the early stages of  
13 mammalian development and the effect of differentiation from iPSCs towards neurons on the  
14 developmental or aging trajectory of the cellular model[7] has yet to be adequately profiled.

15

16 Epigenetic mechanisms, such as DNA methylation (DNAm), are chemical processes that stably regulate  
17 gene expression, and while they are sensitive to environmental stimuli, they also underpin key  
18 developmental processes [8, 9]. As a consequence, they are not only dynamic over the life course, but  
19 are dynamic in a consistent manner across individuals [10]. There has been much interest and success  
20 in capitalizing on these patterns of epigenetic variation to predict the age of an individual from a  
21 biological sample. Chronological age predictors based on DNAm profiles, known as “epigenetic clocks”  
22 or “DNAm clocks”, have become commonplace in the epigenetic literature, as they can predict the  
23 “epigenetic age” of a sample, which correlates strongly with chronological age. Epigenetic age, defined  
24 here as age predicted by an epigenetic clock, correlates strongly with chronological age, albeit not  
25 perfectly, and there is interest in whether the deviations from this prediction, referred to as age

1 acceleration, are meaningful in the context of disease [11, 12]. The most well-known epigenetic clock  
2 is the Horvath multi-tissue clock (MTC) which was developed using a large number of samples ( $n >$   
3 8000) from 51 different tissues and cell types [13]. While in general the MTC generates reliable  
4 predictions of chronological age for most samples, there is increasing recognition that its performance  
5 is dependent on the characteristics of the training dataset (e.g. tissue/cell type and age range) and  
6 greater accuracy can be achieved with clocks trained on more refined sample sets, such as those from  
7 a single tissue [14, 15]. To this end, a number of new DNAm clocks have been established based on  
8 specific tissue types, like whole blood [16] or brain tissue [14], which demonstrate more accurate  
9 predictions within the specified tissue. A less established refinement of epigenetics clocks is the  
10 application to specific developmental stages, with embryonic or fetal samples, in particular, either  
11 omitted from or underrepresented in most existing clocks. An exception here are algorithms that  
12 predict gestational age (GA) of newborns, developed using pre- and perinatal DNAm data from blood  
13 samples [17] or placental samples [18]. While existing epigenetic clocks have been shown to accurately  
14 predict age in either postnatal brain samples (predominantly adult and older age) or non-brain  
15 prenatal samples, these tools have not been through tested on prenatal brain samples and it is  
16 unknown whether they are able to delineate the earliest stages of brain development.

17

18 Previous analysis applying the MTC to DNAm data generated from iPSCs and their corresponding  
19 primary cells from adult donors found that despite the primary cells predicting the donor's  
20 chronological age accurately, the induction of pluripotency reversed the aging process, with the  
21 matched iPSCs predicted as postnatal but close to zero [13]. As human pluripotent cells only occur  
22 during prenatal development, we hypothesize that existing clocks are not sensitive enough to  
23 accurately predict iPSCs at prenatal developmental stages. The inability to accurately estimate age  
24 during this crucial stage of neurodevelopment limits our ability to profile changes in epigenetic age  
25 induced by the differentiation of iPSCs towards neurons using already established DNAm clocks. Here

1 we present a novel DNAm clock developed using prenatal brain samples that accurately predicts fetal  
2 age, outperforming other DNAm clocks in neurodevelopmental samples. We then apply our clock to  
3 iPSCs, iPSC-derived neuronal progenitor cells (NPCs) and neurons to characterize the epigenetic age  
4 of these cellular models before and throughout differentiation.

5

## 6 **Methods**

### 7 *Data pre-processing and quality control.*

8 All statistical analyses were performed using R version 3.5.2 (<https://www.r-project.org/>). All datasets  
9 of which raw data was available were pre-processed by our group following a standard quality control  
10 (QC) and normalization pipeline as described before [14] using either the R package *wateRmelon* [19]  
11 or *bigmelon* [20]. Briefly, samples with low signal intensities or incomplete bisulphite conversion were  
12 excluded prior to applying the *pfilter()* function from the *wateRmelon* package excluding samples with  
13 >1 % of probes with a detection P value >0.05 and probes with >1 % of samples with detection P value  
14 >0.05. This was followed by the exclusion of probes known to be affected by SNPs or known to cross-  
15 hybridize [21] and QC was finished by quantile normalization using the *dasen()* function of the  
16 packages *wateRmelon* or *bigmelon* [19, 20].

17

### 18 *Fetal brain samples.*

19 To develop and profile the performance of our fetal brain clock (FBC), we collated a dataset of 258  
20 fetal brain samples (see **Table S1**) of which 194 were processed by our lab and 64 are a subset (age <  
21 0 years) of a publicly available dataset downloaded from the Gene Expression Omnibus (GEO;  
22 <https://www.ncbi.nlm.nih.gov/geo/>; GSE74193) [22]. Of the samples processed in our lab, 154 overlap  
23 those included in [23] following additional outlier filtering by principal component analysis, where  
24 DNAm was quantified using the Illumina 450K DNA methylation array. The other 40 samples are a new

1 dataset where DNAm was quantified using the Illumina EPIC DNA methylation array. To harmonize  
2 the age variable across datasets, age was converted into days post-conception (dpc), as it represents  
3 the most precise unit of age available in the datasets. Age provided as weeks post-conception was  
4 transformed to days post-conception by dividing by 7, and age reported in (negative) years was  
5 transformed to days post-conception by multiplying by 365 and adding 280.

6

#### 7 *Training and testing datasets.*

8 To create two separate datasets for the purpose of training and testing the FBC, 75% of the samples  
9 from each dataset were randomly assigned into a training dataset (n = 193, age range = 37-184 dpc,  
10 age median = 99 dpc), while the remaining 25% were collated into the testing dataset (n = 65, age  
11 range = 23-153 dpc, age median = 99 dpc) (**Figure S1**), such that there was no overlap between the  
12 training and testing dataset. Of note, a few samples (15 out of 258) would be actually defined as  
13 embryonic (GA < 63 dpc) and not fetal. To simplify the FBC development, only probes available in all  
14 cohorts and with complete data after QC were taken forward (n = 385,069 probes).

15

#### 16 *Adult samples.*

17 To evaluate the performance of the DNAm clocks in adult brain samples we utilized the Brains for  
18 Dementia Research (BDR) cohort DNAm data [14]. Briefly, these data consist of 1,221 samples from  
19 632 donors (age range 41-104 years, median = 84 years), with DNA extracted from the prefrontal  
20 cortex (n = 610) and occipital cortex (n = 611). DNA methylation was quantified using the Illumina EPIC  
21 DNA methylation array, and were pre-processed using our group's standard QC pipeline as described  
22 in [14].

23

#### 24 *Cellular samples.*

1 Five different DNAm datasets profiling iPSCs, iPSC-derived NPCs and iPSC-derived neurons were used  
2 to characterize epigenetic age of the neuronal cell model, details of which can be found in **Table S1**.  
3 Three of these datasets (Imm, Price, Bhinge) were generated by our lab, where DNA methylation was  
4 quantified using the Illumina EPIC DNA methylation array. These were supplemented by two publicly  
5 available datasets, downloaded from GEO (*Sultanov*, GSE105093, and *Fernández-Santiago*, GSE51921)  
6 consisting of Illumina 450K DNA methylation array data [3, 4]. References describing the origin of cell  
7 lines and the different methods used for cell culture and differentiation are listed in **Table S1**. Pre-  
8 processing and QC for the *Fernández-Santiago* dataset was not performed in our lab as no raw data  
9 was available.

10

#### 11 *Fetal brain clock development.*

12 To develop the fetal brain clock we applied an elastic net (EN) regression model, using the approach  
13 described by Horvath [13], regressing chronological age against DNAm level of all available probes.  
14 The EN algorithm selects a subset of DNA methylation probes that together produce the optimal  
15 prediction of the outcome, in this case chronological age, by combining ridge and LASSO (Least  
16 Absolute Shrinkage and Selection Operator) regression. Briefly, ridge regression penalizes the sum of  
17 squared coefficients while LASSO penalizes the sum of the absolute values of coefficients. EN is a  
18 combination of both methods, where the user specifies the extent of the mixing of the two methods  
19 as a number between 0 and 1, in our application this was set to 0.5 [24]. EN is implemented with the  
20 R package *GLMnet* [25]. The shrinkage parameter lambda was calculated using 10-fold cross-validation  
21 on the data, which resulted in a lambda of 3.27.

#### 22 *Fetal brain clock evaluation.*

23 To profile the performance of the FBC, we additionally applied three established DNAm clocks:  
24 Horvath's multi-tissue clock (MTC) [13], Knight's Gestational Age clock (GAC) [17] and Lee's Control

1 Placental epigenetic clock (CPC) [18]. The clocks were applied using the *agep()* function of the  
2 *wateRmelon* package [19], where the default estimates the MTC and other clocks (here the GAC and  
3 CPC) can be estimated by providing the necessary coefficient and intercept values. The predictive  
4 accuracy of each clock was profiled in each dataset by two measures: Pearson's correlation coefficient  
5 with reported chronological age and root mean squared error (RMSE). To investigate potential effects  
6 of sex on the predicted epigenetic age a linear model was fitted in the testing dataset with FBC  
7 predicted epigenetic age as dependent variable, chronological age and sex as main effects and an  
8 interaction of chronological age and sex.

9

#### 10 *Comparison of cellular states.*

11 The FBC was applied to DNAm data for all cellular samples available. To test for differences in  
12 predicted epigenetic age between cell stages within each dataset, either two sample t-tests or ANOVA  
13 followed by Tukey HSD multiple comparison (when three cell stages were available), were used. To  
14 combine results across all datasets, a mixed effects linear model was fitted with predicted epigenetic  
15 age as the dependent variable, a fixed effect for cell stage represented as two dummy variables  
16 contrasting NPCs vs iPSCs and iPSC-neurons vs iPSCs as and a random effect for dataset.

17

## 18 **Results**

### 19 *Fetal brain clock outperforms existing DNAm clocks at predicting age of prenatal brain samples.*

20 We applied EN regression to genome wide DNAm data from a set of prenatal brain samples (n = 193;  
21 **Table S1** and **Figure S1**), to develop the fetal brain clock (FBC). A subset of 107 DNAm probes were  
22 assigned non-zero coefficients and therefore were selected as the basis of the FBC (**Table S2**). We  
23 found no overlap in the DNAm sites selected for the FBC and DNAm sites used in the other clocks we  
24 considered. Testing the FBC clock in an independent test dataset of fetal brain samples (**Table S1** and



1 **Figure S1**) to evaluate its performance we found a strong linear relationship between chronological  
2 and predicted prenatal age ( $r = 0.80$ ; **Figure 1A**) with the majority of samples predicted within 15 days  
3 of their actual chronological age (RMSE = 14.84 dpc). To benchmark the performance of our clock, we  
4 compared it to three existing DNAm clocks: Horvath's MTC [13], Knight's GAC [17] and Lee's CPC [18].  
5 These clocks were selected as they represent either the most well-established algorithm with the  
6 broadest applicability (MTC) or were specifically developed to predict pre- and perinatal gestational  
7 ages, albeit in non-brain tissue (GAC and CPC). Of note, the MTC only predicted 27 fetal brain samples  
8 (41.2%) as prenatal (dpc < 280) with a very weak correlation between chronological and predicted age  
9 ( $r_{\text{MTC}} = 0.06$ ). This correlation is much weaker than those reported in the original manuscript when  
10 Horvath tested the clock in adult samples [13], highlighting the challenges with extrapolating clocks  
11 to samples which were not well represented in the model development. By comparison, the GAC and  
12 CPC perform better than the MTC, although they have smaller correlation coefficients ( $r_{\text{GAC}} = 0.52$  and  
13  $r_{\text{CPC}} = 0.76$ ) and are associated with a larger error (RMSE<sub>GAC</sub> = 21.32 and RMSE<sub>CPC</sub> = 60.08) than the FBC.  
14 Interestingly, while the predictions from the GAC are more precise, it's not as effective at ranking the  
15 samples by age as the CPC. Taken together, these results demonstrate that our novel FBC outperforms  
16 existing clocks at predicting age in fetal brain samples, and therefore is the optimal tool available to  
17 profile the epigenetic age in models of neuronal development. When applying clocks to the training  
18 data, the three established clocks produce similar correlations and RMSEs as in the testing data. As  
19 expected, the predictions of the FBC in the training data are more accurate than the predictions in the  
20 testing data reflecting overfitting of the model (**Figure S2**). Given our previous finding of divergent,  
21 sex-specific age trajectories at multiple DNAm sites during prenatal development [23], we tested  
22 whether the FBC performed differently between males and females in our testing dataset. Although  
23 this analysis initially indicated a significant difference in the correlation with age between males and  
24 females ( $P_{\text{sex}} = 0.0007$ ), on closer inspection we suspected that this was likely driven by outliers.  
25 Indeed, a sensitivity analysis excluding the two samples with youngest and oldest predicted ages  
26 produced a non-significant result ( $P_{\text{sex}} = 0.081$ ).

1

2 *Fetal and gestational age clocks are not able to predict adult ages in adult brain tissue*

3 All four clocks were additionally compared using a dataset where DNAm was profiled from adult brain  
4 samples (**Figure S3**). As expected, the FBC performs poorly in this sample set, with all samples  
5 predicted as prenatal, while the MTC performs the best ( $r_{\text{MTC}} = 0.65$ ,  $\text{RMSE}_{\text{MTC}} = 20.11$  years) as it is  
6 the only clock we considered that was developed using adult samples. As with the FBC, the GAC and  
7 CPC fail to produce predictions of post-natal age again reflecting the fact that they were also  
8 constructed using data from pre- or perinatal samples.

9

10 *Fetal brain clock captures differences in differentiation of iPSCs towards neurons*

11 Having demonstrated that our novel FBC is the optimal clock to profile age in prenatal brain samples,  
12 we applied it to DNAm data from five cellular studies to determine the neuronal development  
13 trajectory of iPSCs differentiating towards neurons. All samples were estimated to have a fetal  
14 epigenetic age, regardless of cell stage, cell line origin or differentiation protocol. Performing  
15 statistical comparisons of the estimated ages between iPSCs and neurons, we observed significant  
16 differences for all datasets (**Figure 2**). For the Imm dataset, which also included proliferative NPCs in  
17 comparison to postmitotic neurons, we additionally found a significant difference between NPCs and  
18 iPSC-neurons ( $\Delta_{\text{mean}} = 20.0$  dpc,  $P = 0.00039$ ), but not between iPSCs and NPCs ( $\Delta_{\text{mean}} = 10$  dpc,  $P =$   
19  $0.24$ ). Combining the data across the five studies, the observed means of the three cell stages were  
20  $\text{mean}_{\text{iPSC}} = 72.14$  dpc,  $\text{mean}_{\text{NPC}} = 68.5$  dpc and  $\text{mean}_{\text{iPSC-neurons}} = 84.28$  dpc (**Figure 3**). Using a mixed  
21 effects model to meta-analyze across studies, we found that iPSC-neurons were predicted to have a  
22 significantly advanced epigenetic age compared to iPSCs ( $\Delta_{\text{mean}} = 12.14$  dpc,  $P = 6.94\text{E-}9$ ) but no  
23 significant difference was observed between iPSC and NPCs ( $\Delta_{\text{mean}} = -3.64$  dpc,  $P = 0.39$ ).

24

## 1 **Discussion**

2 In this study we established a novel epigenetic clock, the fetal brain clock (FBC), to specifically profile  
3 the earliest stages of human neurodevelopment and applied it to determine the epigenetic age of  
4 iPSCs and iPSC-derived NPCs and neurons. Given the lack of fetal brain samples in the development of  
5 existing DNAm clocks prior to this study, there was no tool optimized for estimating the age of fetal  
6 brain samples from DNAm data limiting the ability to characterize neuronal models or indeed any  
7 model of neuronal development. We showed that, in an independent test dataset, the FBC generates  
8 predictions that correlate strongly with chronological age in prenatal brain samples. Furthermore, it  
9 outperforms both a pan-tissue epigenetic clock (Horvath's MTC), and epigenetic clocks focused on the  
10 same developmental stage, but based on DNAm profiled in different tissues (Knight's GAC and Lee's  
11 CPC) [13, 17, 18]. The FBC outperforms these clocks using either correlation or error statistics (RMSE),  
12 indicating that it is not only better at ranking the samples, but it generates more precise estimates. In  
13 contrast, the FBC, performed poorly in an adult brain dataset. Altogether, this reinforces the findings  
14 of previous studies that have also demonstrated that the applicability of DNAm clocks is dependent  
15 on the characteristics of the dataset(s) they were trained on, with the tissue and age range of the  
16 training samples of particular relevance [14, 15]. More specifically, we note that while the accuracy of  
17 a DNAm clock is typically decreased in tissues not represented in its training data, clocks are limited  
18 to predicting ages represented in the training data. If the testing sample lies outside of the age range  
19 of the training data, the clock is unable to provide an appropriate prediction, suggesting that, in  
20 general, age range is more important than tissue when training a clock.

21

22 Previous use of epigenetic clocks has shown that the predicted epigenetic age of iPSCs is significantly  
23 younger than the somatic tissue the cells originate from and the chronological age of the donor at  
24 sample donation [13]. This highlights that the induction of pluripotency reprograms the epigenome,  
25 including at the loci used in the clock algorithm, ultimately leading to a younger predicted epigenetic

1 age. However, in these analyses the predicted ages remained postnatal, which is unexpected as  
2 human pluripotent cells only occur during the early stages of human development and hence we  
3 hypothesized that, with an adequately calibrated clock, iPSCs would be expected to be estimated as  
4 early prenatal. Applying the FBC to five datasets of iPSCs and iPSC-derived NPCs and neurons, we  
5 found this to be the case, where iPSCs were estimated as having a mean age of 72.1 dpc, fitting our  
6 hypothesis that they reflect at least first trimester developmental stages. These results align with  
7 studies that have reported rejuvenation effects on the transcriptome, telomeres and mitochondria of  
8 iPSCs following reprogramming [26–28]. In addition, we profiled the effect on predicted epigenetic  
9 age following the differentiation of iPSCs towards neurons reporting that this increases the mean  
10 predicted age to 84.3 dpc. This age coincides with fetal neurogenesis and suggests that while  
11 differentiation does induce an aging process, it does not accelerate iPSC-neurons to a postnatal state.  
12 Of note, Mertens and colleagues found that, while iPSCs lose age related transcriptomic signatures,  
13 induced neurons (iNs; neurons directly reprogrammed from fibroblasts) keep their specific aging  
14 signatures [27]. Therefore, it would be interesting to apply our FBC to iNs, iPSCs, iPSC-neurons and  
15 their corresponding somatic tissues to verify whether age associated methylation differences are also  
16 preserved in iNs. Altogether, our results indicate that iPSC-neurons may be limited when researching  
17 age-related diseases, like Alzheimer’s disease or other dementias, as many molecular processes  
18 related to an aging phenotype, may not be recapitulated.

19

20 While a strength of our study is the development of a bespoke clock to optimally profile prenatal age  
21 in human samples obtained during fetal development, the FBC has in all datasets tested, only  
22 generated prenatal estimates. Despite this, we are confident that the FBC correctly predicts fetal  
23 epigenetic ages for the cellular data as the predictions for both iPSC and iPSC-neurons are comfortably  
24 contained within the training data age range. This indicates that the predictions are not induced purely  
25 by saturation of the coefficients. In contrast, estimates for the adult brain dataset did lie at the

1 extreme ends, bringing doubt on the meaningfulness of the predictions, an observation that is  
2 confirmed by the lack of correlation with chronological age.

3

4 In summary, we demonstrate that established DNAm clocks struggle to capture changes in epigenetic  
5 age during neurodevelopment and for precise predictions a bespoke clock is required. To this end, we  
6 developed the FBC, a robust predictor of prenatal age in human fetal brain samples. Using this clock  
7 to assess the epigenetic age of iPSCs and differentiated neurons, we found that iPSCs and derived  
8 NPCs and neurons reflect prenatal developmental stages. Our findings question the suitability of the  
9 iPSC-neurons for the study of aging associated processes.

10

## 11 List of abbreviations

| <b>Abbreviation</b> | <b>Definition</b>                               |
|---------------------|-------------------------------------------------|
| AD                  | Alzheimer's Disease                             |
| BDR                 | Brains for Dementia Research                    |
| CPC                 | Control Placental Clock                         |
| DNAm                | DNA methylation                                 |
| dpc                 | Days post-conception                            |
| EN                  | Elastic net                                     |
| FBC                 | Fetal brain clock                               |
| GA                  | Gestational age                                 |
| GAC                 | Gestation age clock                             |
| GEO                 | Gene Expression Omnibus                         |
| iN                  | Induced neuron                                  |
| iPSC                | Induced pluripotent stem cell                   |
| iPSC-neuron         | iPSC-derived neuron                             |
| LASSO               | Least Absolute Shrinkage and Selection Operator |
| MTC                 | Multi-tissue clock                              |

---

|      |                         |
|------|-------------------------|
| NPC  | Neuronal precursor cell |
| QC   | Quality control         |
| RMSE | Root mean squared error |

1

## 2 **Declarations**

### 3 *Ethical approval*

4 Ethical approval for the collection of human fetal brain tissue acquired from the Human  
5 Developmental Biology Resource was granted by the Royal Free Hospital research ethics committee  
6 under reference 08/H0712/34 and Human Tissue Authority material storage license 12220. Ethical  
7 approval for collection of human fetal brain tissue for the Medical Research Council Brain Bank was  
8 granted under reference 08/MRE09/38. Ethical approval for the work with methylomic data of human  
9 brain tissue from the BDR cohort was granted by the University of Exeter, College of Medicine and  
10 Health Research Ethics Committee under reference Mar20/D/009Δ5.

11

### 12 *Consent for publication*

13 Not applicable

14

### 15 *Availability of data and materials*

16 Raw and normalized DNAm data for the human fetal brain samples used to test and train the fetal  
17 brain clock have been submitted to the NCBI Gene Expression Omnibus (GEO;  
18 <http://www.ncbi.nlm.nih.gov/geo/>) under accession numbers GSE58885, GSE74193 and GSE157908.  
19 DNAm data for the cellular dataset are also available under accession numbers GSE158089,  
20 GSE105093 and GSE51921. DNAm data for the cellular dataset *Bhinge* is available from the  
21 corresponding author on request. The coefficients of the FBC are included within the article in **Table**

1 **S2.** The custom R script used for this study is available at  
2 <https://github.com/LSteg/EpigeneticFetalClock>.

3

#### 4 *Competing interests*

5 The authors declare that they have no competing interests.

6

#### 7 *Funding*

8 This work was in part funded by the Simons Foundation (SFARI) grant 573312 awarded to JM. The  
9 human embryonic and fetal material was provided by the Joint MRC Wellcome Trust Human  
10 Developmental Biology Resource (<http://www.hdbr.org>), which is funded by Medical Research  
11 Council grant G0700089 and Wellcome Trust grant GR082557. The BDR is jointly funded by Alzheimer's  
12 Research UK and the Alzheimer's Society in association with the Medical Research Council. The South  
13 West Dementia Brain Bank is part of the Brains for Dementia Research program, jointly funded by  
14 Alzheimer's Research UK and Alzheimer's Society, and is also supported by BRACE (Bristol Research  
15 into Alzheimer's and Care of the Elderly) and the Medical Research Council. E.H., and J.M. were  
16 supported by Medical Research Council grant K013807. G.S. was supported by a PhD studentship from  
17 the Alzheimer's Society. N.J.B. was supported by the Medical Research Council grant MR/L010674/2.  
18 N.D.A. was supported by Medical Research Council grant N013255/1.

19

#### 20 *Authors' contributions*

21 L.C.S, G.L.S. and E.H. designed the work; J.M., E.H., N.J.B, A.B., J.P., N.D.A. and K.L. acquired funding;  
22 J.I., J.P.D., R.F., S.C.N., A.R.J., J.B., G.W.A.N., E.M.W., L.W.P., E.L.C., K.M.J., E.P., A.B., N.J.B. and N.D.A

1 acquired and processed samples and data; L.C.S, G.L.S. and E.H analyzed and interpreted data; L.C.S.  
2 and E.H. wrote the paper.

3

#### 4 *Acknowledgements*

5 We would like to gratefully acknowledge all donors and their families for the tissue provided for this  
6 study.

7

#### 8 **Figure Legends**

9 **Figure 1 Fetal brain clock outperforms other DNAm clocks when applied to neurodevelopmental**  
10 **samples.** Shown are scatterplots comparing chronological age (x-axis; days post-conception) against  
11 (y-axis; days post-conception) predicted epigenetic age calculated using **A** Fetal Brain Clock (FBC) **B**  
12 Horvath's multi tissue clock (MTC); **C** Knight's Gestational Age Clock (GAC); **D** Lee's Control Placental  
13 Clock (CPC); in an independent fetal brain sample (n = 65). The black line indicates the identity line of  
14 chronological and predicted epigenetic age and represents a perfect prediction. Two statistics were  
15 calculated to evaluate the precision of each DNAm clock: Pearson's correlation coefficient (r) and the  
16 root mean squared error (RMSE).

17

#### 18 **Figure 2 Comparisons of predicted epigenetic age from fetal brain clock between iPSC**

19 **differentiation states.** Boxplots comparing the distribution of predicted epigenetic age (days post-  
20 conception) separated by cellular stage, where each panel represents a different dataset. P values of  
21 Tukey HSD corrected ANOVA for the Imm dataset and two-sample t-tests for Price, Fernández-  
22 Santiago and Sultanov datasets are given. F. -S. = Fernández-Santiago.



1

2 **Figure 3 iPSCs are significantly younger than iPSC induced neurons using age estimated by the FBC.**

3 Boxplots of predicted epigenetic age calculated using the FBC where samples are grouped by cell stage  
4 (n = 82, 30 iPSCs, 4 NPCs, 48 iPSC-neurons) and colored by dataset. P values from mixed effects model  
5 are given for differences between iPSCs and NPCs (non-significant) and iPSC and neurons. F.-S. =  
6 Fernández-Santiago.

7

8 **Additional Files**

9 **Additional File 1: Table S1 Summary of fetal, adult and cellular datasets.**

10

11 **Additional File 2: Table S2 Intercept and coefficients of the fetal brain clock.**

12

13 **Additional File 3: Figure S1 Histogram of age distribution.** Chronological age of the fetal samples  
14 measured in days post-conception in A) training data and B) testing data.

15

16 **Additional File 4: Figure S2 Comparison of predictions from the four DNAm clocks in the training**  
17 **data (n = 193).** Shown are scatterplots comparing chronological age (x-axis) against age (y-axis)  
18 predicted epigenetic age for **A** Fetal Brain Clock (FBC); **B** Horvath's multi tissue clock (MTC); **C** Knight's  
19 Gestational Age Clock (GAC); **D** Lee's Control Placental Clock (CPC) in the data used for training of the  
20 FBC. Where necessary, predicted age was converted to days post-conception. The black line indicates  
21 the identity line of chronological and predicted epigenetic age and represents a perfect prediction.  
22 Two statistics were calculated to evaluate the precision of each DNAm clock: Pearson's correlation  
23 coefficient (r) and the root mean squared error (RMSE).

24

25 **Additional File 5: Figure S3 Comparison of predictions from the four DNAm clocks in adult brain**  
26 **samples (n = 1221).** Shown are scatterplots comparing chronological age (x-axis) against (y-axis)

1 predicted epigenetic age calculated using **A** Fetal Brain Clock (FBC); **B** Horvath's multi tissue clock  
2 (MTC); **C** Knight's Gestational Age Clock (GAC); **D** Lee's Control Placental Clock (CPC) in an independent  
3 adult brain dataset. Where necessary, predicted age was converted to years, where 0 indicates birth.  
4 The black line indicates the identity line of chronological and predicted epigenetic age and represents  
5 a perfect prediction. Two statistics were calculated to evaluate the precision of each DNAm clock:  
6 Pearson's correlation coefficient ( $r$ ) and the root mean squared error (RMSE).

7

## 8 **References**

- 9 1. Takahashi K, Tanabe K, Ohnuki M, Narita M, Ichisaka T, Tomoda K, Yamanaka S (2007) Induction  
10 of Pluripotent Stem Cells from Adult Human Fibroblasts by Defined Factors. *Cell* 131:861–872
- 11 2. Telezhkin V, Schnell C, Yarova P, et al (2016) Forced cell cycle exit and modulation of GABA A ,  
12 CREB, and GSK3 $\beta$  signaling promote functional maturation of induced pluripotent stem cell-  
13 derived neurons. *Am J Physiol Physiol* 310:C520–C541
- 14 3. Fernández-Santiago R, Carballo-Carbajal I, Castellano G, et al (2015) Aberrant epigenome in  
15 iPSC -derived dopaminergic neurons from Parkinson's disease patients. *EMBO Mol Med*  
16 7:1529–1546
- 17 4. Sultanov R, Lebedeva O, Arapidi G, Lagarkova M, Kiselev S (2018) Methylation profile of  
18 induced pluripotent stem cells generated by integration and integration-free approaches. *Data*  
19 Br 17:662–666
- 20 5. Gordon J, Amini S, White MK (2013) General overview of neuronal cell culture. *Methods Mol*  
21 Biol 1078:1–8
- 22 6. Arber C, Lovejoy C, Wray S (2017) Stem cell models of Alzheimer's disease: Progress and  
23 challenges. *Alzheimer's Res Ther*. <https://doi.org/10.1186/s13195-017-0268-4>
- 24 7. Morgani S, Nichols J, Hadjantonakis AK (2017) The many faces of Pluripotency: In vitro  
25 adaptations of a continuum of in vivo states. *BMC Dev Biol* 17:1–20
- 26 8. Monk D, Mackay DJG, Eggermann T, Maher ER, Riccio A (2019) Genomic imprinting disorders:  
27 lessons on how genome, epigenome and environment interact. *Nat Rev Genet* 20:235–248
- 28 9. Zeng Y, Chen T (2019) DNA methylation reprogramming during mammalian development.  
29 *Genes (Basel)*. <https://doi.org/10.3390/genes10040257>
- 30 10. Smith ZD, Meissner A (2013) DNA methylation: Roles in mammalian development. *Nat Rev*  
31 Genet 14:204–220
- 32 11. Levine ME, Lu AT, Quach A, et al (2018) An epigenetic biomarker of aging for lifespan and  
33 healthspan. *Aging (Albany NY)* 10:573–591
- 34 12. Hillary RF, Stevenson AJ, McCartney DL, et al (2020) Epigenetic measures of ageing predict the  
35 prevalence and incidence of leading causes of death and disease burden. *Clin Epigenetics*  
36 12:115

- 1 13. Horvath S (2013) DNA methylation age of human tissues and cell types. *Genome Biol.*  
2 <https://doi.org/10.1186/gb-2013-14-10-r115>
- 3 14. Shireby G, Davies J, Francis P, et al (2020) Recalibrating the Epigenetic Clock: Implications for  
4 Assessing Biological Age in the Human Cortex. *bioRxiv* 2020.04.27.063719
- 5 15. El Khoury LY, Gorrie-Stone T, Smart M, et al (2019) Systematic underestimation of the  
6 epigenetic clock and age acceleration in older subjects. *Genome Biol* 20:283
- 7 16. Zhang Q, Vallerga CL, Walker RM, et al (2019) Improved precision of epigenetic clock estimates  
8 across tissues and its implication for biological ageing. *Genome Med* 11:54
- 9 17. Knight AK, Craig JM, Theda C, et al (2016) An epigenetic clock for gestational age at birth based  
10 on blood methylation data. *Genome Biol* 17:1–11
- 11 18. Lee Y, Choufani S, Weksberg R, et al (2019) Placental epigenetic clocks: Estimating gestational  
12 age using placental DNA methylation levels. *Aging (Albany NY)* 11:4238–4253
- 13 19. Pidsley R, Y Wong CC, Volta M, Lunnon K, Mill J, Schalkwyk LC (2013) A data-driven approach  
14 to preprocessing Illumina 450K methylation array data. *BMC Genomics.*  
15 <https://doi.org/10.1186/1471-2164-14-293>
- 16 20. Gorrie-Stone TJ, Smart MC, Saffari A, Malki K, Hannon E, Burrage J, Mill J, Kumari M, Schalkwyk  
17 LC (2019) Bigmelon: Tools for analysing large DNA methylation datasets. *Bioinformatics*  
18 35:981–986
- 19 21. Chen YA, Lemire M, Choufani S, Butcher DT, Grafodatskaya D, Zanke BW, Gallinger S, Hudson  
20 TJ, Weksberg R (2013) Discovery of cross-reactive probes and polymorphic CpGs in the Illumina  
21 Infinium HumanMethylation450 microarray. *Epigenetics* 8:203–209
- 22 22. Jaffe AE, Gao Y, Deep-Soboslay A, Tao R, Hyde TM, Weinberger DR, Kleinman JE (2015) Mapping  
23 DNA methylation across development, genotype and schizophrenia in the human frontal  
24 cortex. *Nat Neurosci* 19:40–47
- 25 23. Spiers H, Hannon E, Schalkwyk LC, Smith R, Wong CCY, O'Donovan MC, Bray NJ, Mill J (2015)  
26 Methyloomic trajectories across human fetal brain development. *Genome Res* 25:338–352
- 27 24. Zou H, Hastie T (2005) Regularization and variable selection via the elastic net. *J R Stat Soc Ser*  
28 *B Stat Methodol* 67:301–320
- 29 25. Friedman J, Hastie T, Tibshirani R (2010) Regularization paths for generalized linear models via  
30 coordinate descent. *J Stat Softw* 33:1–22
- 31 26. Suhr ST, Chang EA, Tjong J, Alcasid N, Perkins GA, Goissis MD, Ellisman MH, Perez GI, Cibelli JB  
32 (2010) Mitochondrial Rejuvenation After Induced Pluripotency. *PLoS One.*  
33 <https://doi.org/10.1371/journal.pone.0014095>
- 34 27. Mertens J, Paquola ACM, Ku M, et al (2015) Directly Reprogrammed Human Neurons Retain  
35 Aging-Associated Transcriptomic Signatures and Reveal Age-Related Nucleocytoplasmic  
36 Defects. *Cell Stem Cell* 17:705–718
- 37 28. Lapasset L, Milhavel O, Prieur A, et al (2011) Rejuvenating senescent and centenarian human  
38 cells by reprogramming through the pluripotent state. *Genes Dev* 25:2248–2253
- 39 29. Mattis VB, Tom C, Akimov S, et al (2014) HD iPSC-derived neural progenitors accumulate in  
40 culture and are susceptible to BDNF withdrawal due to glutamate toxicity. *Hum Mol Genet*  
41 24:3257–3271

- 1 30. Cocks G, Curran S, Gami P, et al (2014) The utility of patient specific induced pluripotent stem  
2 cells for the modelling of Autistic Spectrum Disorders. *Psychopharmacology (Berl)* 231:1079–  
3 1088
- 4 31. Warre-Cornish K, Perfect L, Nagy R, et al (2020) Interferon- $\gamma$  signaling in human iPSC-derived  
5 neurons recapitulates neurodevelopmental disorder phenotypes. *Sci Adv* 6:eaay9506
- 6 32. Bhinge A, Namboori SC, Zhang X, VanDongen AMJ, Stanton LW (2017) Genetic Correction of  
7 SOD1 Mutant iPSCs Reveals ERK and JNK Activated AP1 as a Driver of Neurodegeneration in  
8 Amyotrophic Lateral Sclerosis. *Stem Cell Reports* 8:856–869
- 9
- 10

**A FBC**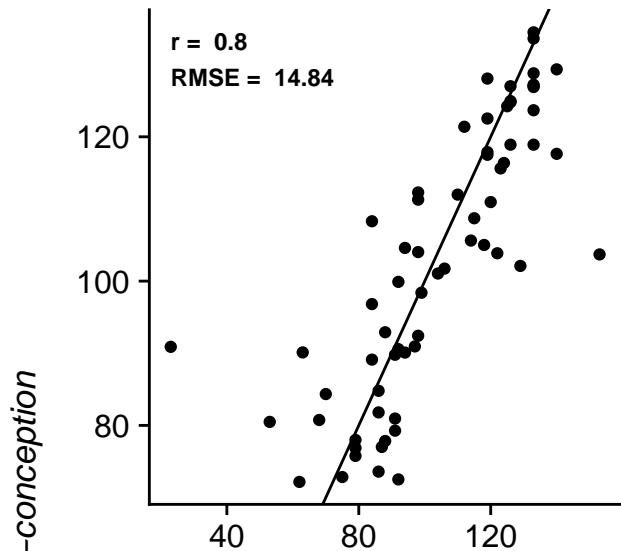**B MTC**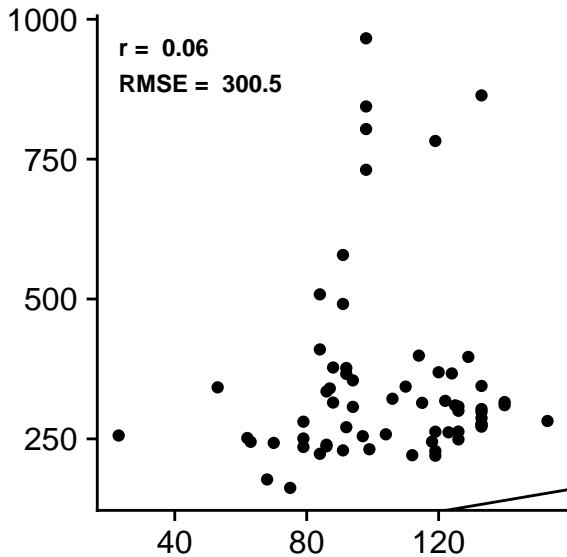**C GAC**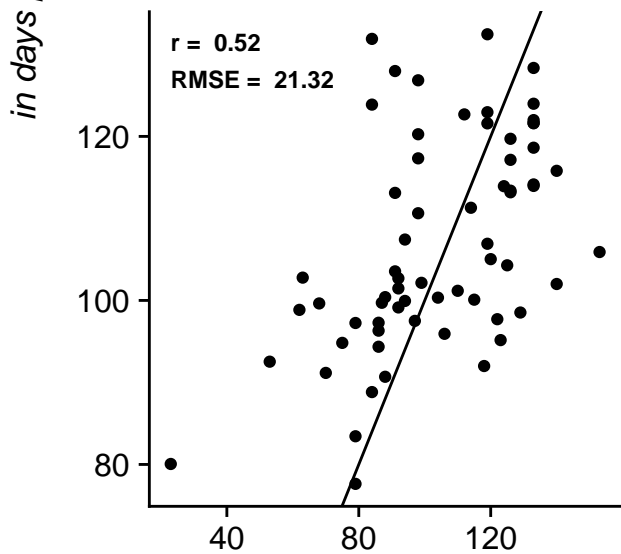**D CPC**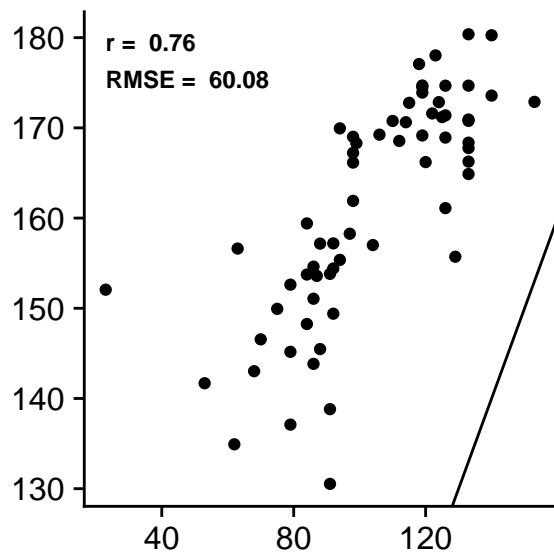**Chronological Age***in days post-conception***Predicted Age***in days post-conception*

**A Imm**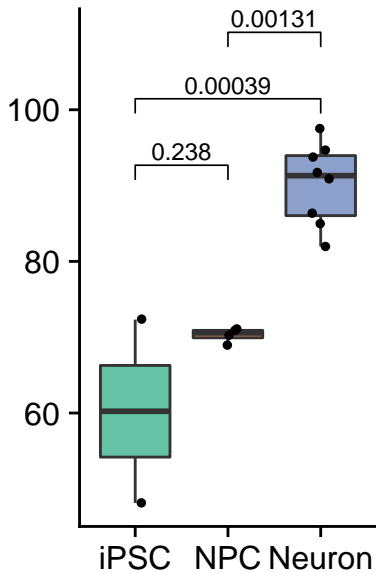**B Price**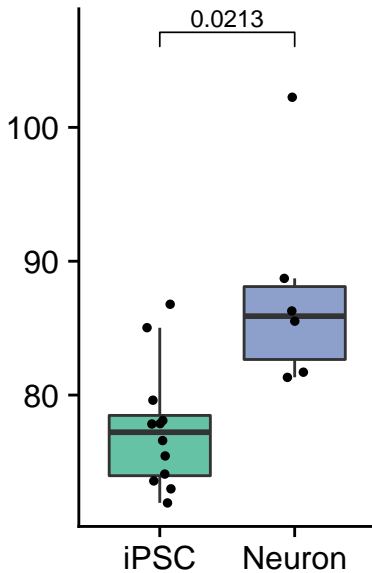**C Bhinge**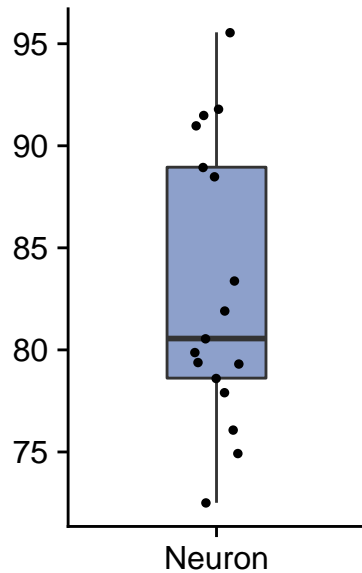**D F.- S.**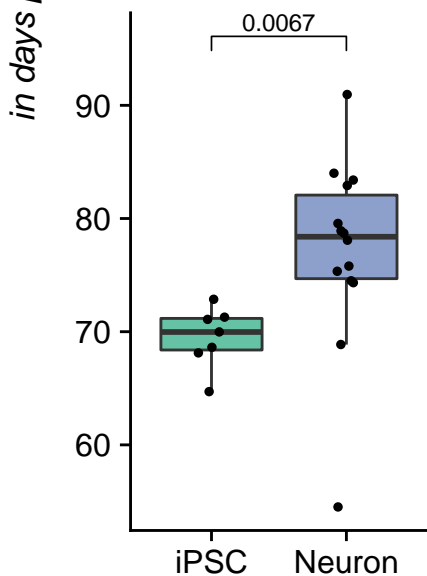**E Sultanov**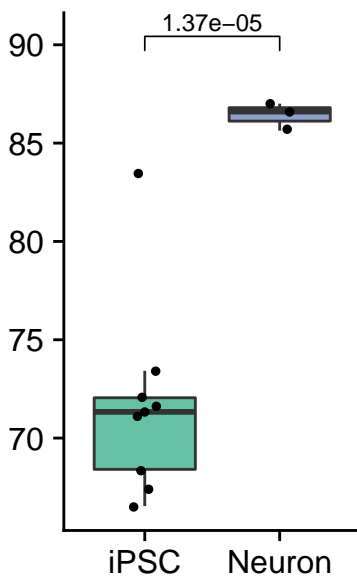

**Predicted Age**  
*in days post-conception*

**Cell Stage**

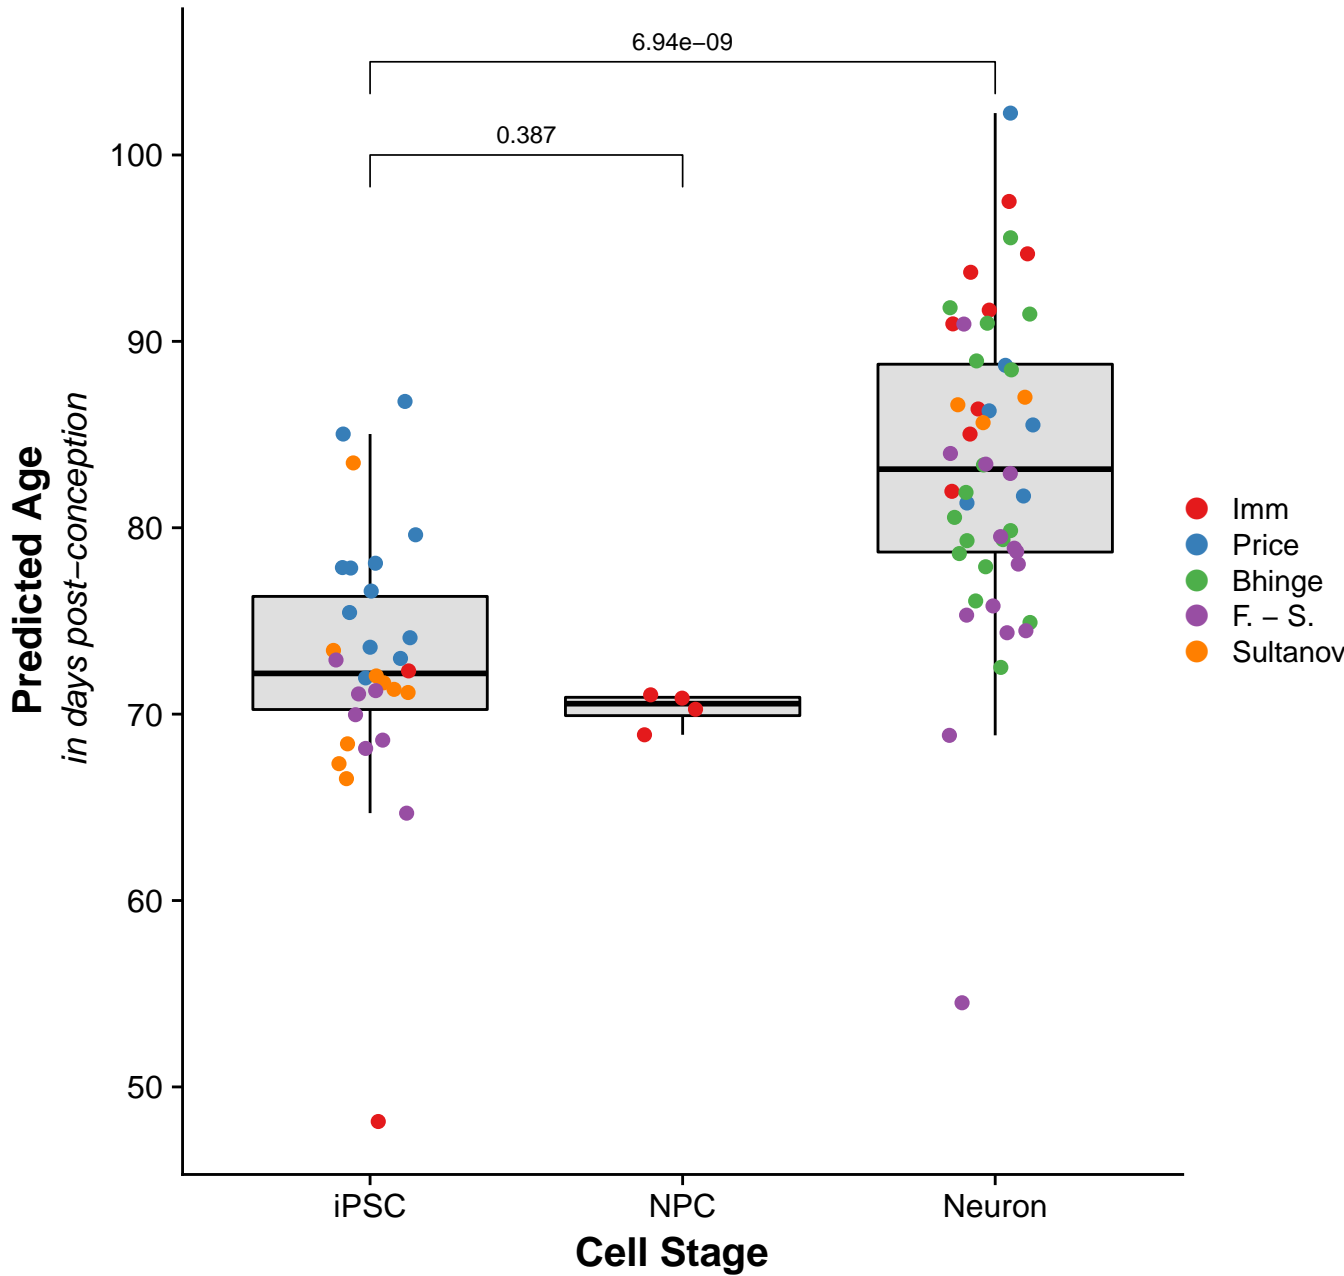

Source: https://www.biorxiv.org/content/10.1101/2020.10.14.339093v1.full.pdf
