1 **Title**

2 Novel epigenetic clock for fetal brain development predicts prenatal age for cellular stem cell models  
3 and derived neurons.

4 **Authors**

5 Leonard C. Steg<sup>1</sup>, Gemma L. Shireby<sup>1</sup>, Jennifer Imm<sup>1</sup>, Jonathan P. Davies<sup>1</sup>, Alice Franklin<sup>1</sup>, Robert  
6 Flynn<sup>1</sup>, Seema C. Namboori<sup>1</sup>, Akshay Bhinge<sup>1</sup>, Aaron R. Jeffries<sup>1</sup>, Joe Burrage<sup>1</sup>, Grant W. A. Neilson<sup>1</sup>,  
7 Emma M. Walker<sup>1</sup>, Leo W. Perfect<sup>2</sup>, Jack Price<sup>2</sup>, Grainne McAlonan<sup>3,4</sup>, Deepak P. Srivastava<sup>2,4</sup>,  
8 Nicholas J. Bray<sup>5</sup>, Emma L. Cope<sup>6</sup>, Kimberly M. Jones<sup>6</sup>, Nicholas D. Allen<sup>6</sup>, Ehsan Pishva<sup>1,7</sup>, Emma L.  
9 Dempster<sup>1</sup>, Katie Lunnon<sup>1</sup>, Jonathan Mill<sup>1</sup>, & Eilis Hannon<sup>1,\*</sup>

10 <sup>1</sup> University of Exeter Medical School, College of Medicine and Health, University of Exeter, Exeter,  
11 UK.

12 <sup>2</sup> Department of Basic and Clinical Neuroscience, Institute of Psychiatry, Psychology and  
13 Neuroscience, King's College London, UK.

14 <sup>3</sup> Department of Forensic and Neurodevelopmental Sciences, King's College London, London, UK.

15 <sup>4</sup> MRC Centre for Neurodevelopmental Disorders, King's College London, London, UK.

16 <sup>5</sup> Division of Psychological Medicine and Clinical Neurosciences, School of Medicine, Cardiff  
17 University, Cardiff, UK.

18 <sup>6</sup> School of Biosciences, Cardiff University, Cardiff, UK.

19 <sup>7</sup> Department of Psychiatry and Neuropsychology, School for Mental Health and Neuroscience  
20 (MHeNS), Maastricht University, Maastricht, The Netherlands.

21 \* Corresponding author: Eilis Hannon, University of Exeter Medical School, RILD Building Level 3,  
22 Royal Devon and Exeter Hospital, Barrack Rd, Exeter. EX2 5DW. UK. E-mail: [e.j.hannon@exeter.ac.uk](mailto:e.j.hannon@exeter.ac.uk)

1 **Keywords**

2 Epigenetic clock, DNA methylation, fetal, neurodevelopment, induced pluripotent stem cells, iPSC-  
3 derived neurons, neuronal precursor cells, DNAm clock

4 **Abstract**

5 Induced pluripotent stem cells (iPSCs) and their differentiated neurons (iPSC-neurons) are a widely  
6 used cellular model in the research of the central nervous system. However, it is unknown how well  
7 they capture age-associated processes, particularly given that pluripotent cells are only present  
8 during the earliest stages of mammalian development. Epigenetic clocks utilize coordinated age-  
9 associated changes in DNA methylation to make predictions that correlate strongly with  
10 chronological age. It has been shown that the induction of pluripotency rejuvenates predicted  
11 epigenetic age. As existing clocks are not optimized for the study of brain development, we  
12 developed the fetal brain clock (FBC), a bespoke epigenetic clock trained in human prenatal brain  
13 samples in order to investigate more precisely the epigenetic age of iPSCs and iPSC-neurons. The FBC  
14 was tested in two independent validation cohorts across a total of 194 samples, confirming that the  
15 FBC outperforms other established epigenetic clocks in fetal brain cohorts. We applied the FBC to  
16 DNA methylation data from iPSCs and iPSC-derived neuronal precursor cells and neurons, finding  
17 that these cell types are epigenetically characterized as having an early fetal age. Furthermore, while  
18 differentiation from iPSCs to neurons significantly increases epigenetic age, iPSC-neurons are still  
19 predicted as being fetal. Together our findings reiterate the need to better understand the  
20 limitations of existing epigenetic clocks for answering biological research questions and highlight a  
21 limitation of iPSC-neurons as a cellular model of age-related diseases.

22 **MAIN TEXT**

23 **Introduction**

24 Induced pluripotent stem cells (iPSCs) offer a unique cellular system to investigate disease in human-  
25 derived cells. iPSCs are obtained by treating skin or blood cells with a set of core pluripotency

1 transcription factors that reprogram the cells to a pluripotent state [1]. Established iPSC lines have  
2 the capacity to be further differentiated into specific cell types, including neurons, when treated  
3 with the appropriate factors [2–4]. This is of particular interest for neuroscience, as the only  
4 alternative cellular model for human neurons are immortalized cell lines. Because immortalized cell  
5 lines retain some physiological properties of the cancerous cells they were derived from [5] they do  
6 not fully recapitulate the neuronal phenotype. iPSC-derived neurons (iPSC-neurons), on the other  
7 hand, express appropriate morphological and neurophysiological properties of neurons and subject  
8 to different protocols can be differentiated into a wide range of specific neuronal subtypes [6]. iPSCs  
9 and their neuronal derivatives have been widely used to research disorders of the central nervous  
10 system, including developmental disorders such as autism and schizophrenia and age-related  
11 diseases such as Alzheimer’s disease (AD) and Parkinson’s disease. However, the extent to which  
12 iPSCs and especially iPSC-neurons capture age-associated processes is not known, which is  
13 fundamental to the study of age-related diseases. Of specific relevance is the fact that pluripotent  
14 cells only occur during the early stages of mammalian development and the effect of differentiation  
15 from iPSCs towards neurons on the developmental or aging trajectory of the cellular model [7] has  
16 yet to be adequately profiled.

17

18 Epigenetic mechanisms, such as DNA methylation (DNAm), are chemical processes that stably  
19 regulate gene expression, and while they are sensitive to environmental stimuli they also underpin  
20 key developmental processes [8–10]. There has been much interest and success in capitalizing on  
21 these patterns of epigenetic variation to derive individual age predictions from a biological sample.  
22 Age predictors based on DNAm, known as “epigenetic clocks” or “DNAm clocks”, are widely used to  
23 predict the “epigenetic age” of a sample. Epigenetic age, defined here as age predicted by an  
24 epigenetic clock, correlates strongly with chronological age, albeit not perfectly, and it has been  
25 hypothesized that the deviations from this prediction, referred to as age acceleration, are

1 meaningful in the context of disease [11, 12]. The most well-known epigenetic clock is the Horvath  
2 multi-tissue clock (MTC) which was developed using a large number of samples ( $n > 8000$ ) from 51  
3 different tissues and cell types [13]. Overall, the MTC generates reliable predictions of chronological  
4 age for most sample-types, although there are potential biases when using Horvath's clock in  
5 samples derived from certain tissues, especially the brain [14, 15]. To this end, a number of new  
6 DNAm clocks have been developed for specific tissue types, including whole blood [16] and cortex  
7 [14], which demonstrate more accurate predictions within the specified tissue. A less established  
8 refinement of epigenetics clocks is the application to specific developmental stages, with prenatal  
9 samples excluded or underrepresented in most training datasets. Recently, clocks were developed to  
10 predict gestational age (GA) of newborns, derived using pre- and perinatal DNAm data from blood  
11 samples [17] or placental samples [18]. While existing epigenetic clocks have been shown to  
12 accurately predict age in either postnatal brain samples (predominantly middle and older age) or  
13 non-brain prenatal samples, these tools have not been thoroughly tested on prenatal brain samples,  
14 and it is unknown whether they are able to delineate the earliest stages of brain development.

15

16 Previous analysis applying the MTC to DNAm data generated from iPSCs and their corresponding  
17 primary cells from adult donors found that the induction of pluripotency reversed the aging process,  
18 with iPSCs predicted as postnatal, with an epigenetic age close to zero (i.e. birth) [13]. As human  
19 pluripotent cells only occur during prenatal development, we hypothesize that existing clocks are  
20 not sensitive enough to accurately predict iPSCs at prenatal developmental stages. The inability to  
21 accurately estimate age during this crucial stage of neurodevelopment limits our ability to profile  
22 changes in epigenetic age induced by the differentiation of iPSCs into specific cell-types using  
23 already established DNAm clocks. Here we present a novel DNAm clock developed using prenatal  
24 brain samples that accurately predicts fetal age, outperforming other DNAm clocks in  
25 neurodevelopmental samples. We then apply our clock to iPSCs, iPSC-derived neuronal progenitor

1 cells (NPCs) and iPSC-derived neurons, as well as in other cellular stem cell models and derived  
2 neuronal cells, to characterize the epigenetic age of these cellular models before and during the  
3 differentiation process.

4

## 5 **Methods**

6 All statistical analyses were performed using R version 3.5.2 (<https://www.r-project.org/>) [19].

### 7 ***Development of Fetal Brain Clock (FBC)***

#### 8 *Description of fetal brain samples*

9 To develop and profile the performance of the fetal brain clock (FBC), we collated a dataset of 258  
10 fetal brain samples (see **Table S1**) of which 194 were processed by our group at the University of  
11 Exeter as described previously [20] and 64 were a subset (age < 0 years) of a publicly available  
12 dataset downloaded from the Gene Expression Omnibus (GEO; <https://www.ncbi.nlm.nih.gov/geo/>;  
13 GSE74193) [21]. Of the samples processed in Exeter, 154 overlap those included in [20] following  
14 additional outlier filtering by principal component analysis, where DNAm was quantified using the  
15 Illumina 450K DNA methylation array. The other 40 samples represent additional samples where  
16 DNAm was quantified using the Illumina EPIC DNA methylation array using a standard protocol as  
17 previously described [14].

18

#### 19 *Data pre-processing and quality control.*

20 All datasets for which raw data was available were pre-processed following a standard quality  
21 control (QC) and normalization pipeline as described before [14] using either the R package  
22 *wateRmelon* [22] or *bigmelon* [23]. Briefly, samples with low signal intensities or incomplete bisulfite  
23 conversion were excluded prior to applying the *pfilter()* function from the *wateRmelon* package,

1 excluding samples with >1 % of probes with a detection P value >0.05 and probes with >1 % of  
2 samples with detection P value >0.05. This was followed by the exclusion of probes known to be  
3 affected by SNPs or known to cross-hybridize [24]. QC was finished by quantile normalization using  
4 the *dasen()* function of the packages *wateRmelon* or *bigmelon* [22, 23]. To harmonize the age  
5 variable across datasets, age was converted into days post-conception (dpc), as it represents the  
6 most precise unit of age available across the datasets. Where age was provided as weeks post-  
7 conception it was transformed to days post-conception by dividing by 7, and where age was  
8 reported in (negative) years it was transformed to days post-conception by multiplying by 365 and  
9 adding 280. Of note, a few samples (15 out of 258) are actually defined as embryonic (GA < 63 dpc)  
10 and not fetal.

11

#### 12 *Fetal brain clock development.*

13 To create two separate datasets for the purpose of training and testing the FBC, 75% of the samples  
14 from each dataset were randomly assigned into a training dataset (n = 193, age range = 37-184 dpc,  
15 age median = 99 dpc), while the remaining 25% included in the testing dataset (n = 65, age range =  
16 23-153 dpc, age median = 99 dpc) (**Figure S1, Table S1**). There was no overlap in samples between  
17 the training and testing dataset. To simplify the FBC development, only probes available in all  
18 samples after QC were taken forward (n = 385,069 probes). To develop the fetal brain clock we  
19 applied an elastic net (EN) regression model, using the approach described by Horvath [13],  
20 regressing chronological age against DNAm level of all available probes. The EN algorithm selects a  
21 subset of DNA methylation probes that together produce the optimal prediction of the outcome, in  
22 this case chronological age, by combining ridge and LASSO (Least Absolute Shrinkage and Selection  
23 Operator) regression. Briefly, ridge regression penalizes the sum of squared coefficients while LASSO  
24 penalizes the sum of the absolute values of coefficients. EN is a combination of both methods,  
25 where the user specifies the extent of the mixing of the two methods as a number between 0 and 1,

1 in our application this was set to 0.5 [25]. EN was implemented with the R package *GLMnet* [26].  
2 The shrinkage parameter lambda was calculated using 10-fold cross-validation on the data, which  
3 resulted in a lambda of 3.27.

4

#### 5 *Statistical evaluation of FBC performance*

6 To profile the performance of the FBC, we additionally tested three established DNAm clocks:  
7 Horvath's multi-tissue clock (MTC) [13], Knight's Gestational Age clock (GAC) [17] and Lee's Control  
8 Placental epigenetic clock (CPC) [18]. The clocks were applied using the *agep()* function of the  
9 *wateRmelon* package [22], where the default estimates the MTC and other clocks (here the GAC and  
10 CPC) can be estimated by providing the necessary coefficient and intercept values. The predictive  
11 accuracy of each clock was profiled in each dataset by two measures: Pearson's correlation  
12 coefficient with reported chronological age and root mean squared error (RMSE). To investigate  
13 potential effects of sex on the predicted epigenetic age, linear models were fitted in the testing and  
14 validation datasets with FBC predicted epigenetic age as dependent variable, chronological age and  
15 sex as main effects and an interaction of chronological age and sex.

16

#### 17 ***Validation of the Fetal Brain Clock (FBC) in additional fetal datasets and adult cortex***

18 To further test the FBC, we used data from 96 additional fetal brain samples currently being  
19 assessed by our group (unpublished data), none of which overlapped with either the training data or  
20 test data described in the previous section, with DNAm quantified using the Illumina EPIC DNA  
21 methylation array. QC and normalization were performed as described above. We also included  
22 data from 33 fetal samples from two publicly available datasets on GEO (GSE116754 and GSE90871)  
23 [27, 28], where DNAm was quantified using the Illumina 450K DNA methylation array. Pre-processing  
24 and QC for the publicly available datasets was not performed in our lab as no raw data was available.

1 Age of all samples was converted to dpc as described above. The combined validation dataset has an  
2 age range of 42 – 280 dpc with the median at 112 dpc (**Figure S1, Table S1**). To evaluate the  
3 performance of the DNAm clocks in adult brain samples we utilized data from the Brains for  
4 Dementia Research (BDR) cohort previously generated by our group [14]. Briefly, these data consist  
5 of 1,221 samples from 632 donors (age range 41-104 years, median = 84 years), with DNA extracted  
6 from the prefrontal cortex (n = 610) and occipital cortex (n = 611). DNAm was quantified using the  
7 Illumina EPIC DNAm array, and were pre-processed using a standard QC pipeline as described in [14].

8

#### 9 *Statistical evaluation of FBC performance*

10 The predictive accuracy of the FBC was profiled in each dataset by two measures: Pearson's  
11 correlation coefficient with reported chronological age and root mean squared error (RMSE).

12

#### 13 ***Testing of Fetal Brain Clock (FBC) in cellular samples***

14

##### 15 *iPSC - neuron samples.*

16 Five different DNAm datasets generated using iPSCs, iPSC-derived NPCs and iPSC-derived neurons  
17 were used to characterize epigenetic age of the neuronal cell model, details of which can be found in  
18 **Table S1**. For two of these datasets (*Imm, Price*) DNAm data was generated by our lab in Exeter,  
19 where DNAm was quantified using the Illumina EPIC DNA methylation array. These were  
20 supplemented by three publicly available datasets, downloaded from GEO (*Nazor, GSE31848,*  
21 *Sultanov, GSE105093, and Fernández-Santiago, GSE51921*) consisting of Illumina 450K DNAm array  
22 data [3, 4, 29]. References describing the origin of cell lines and the different methods used for cell  
23 culture and differentiation are listed in **Table S1**. Pre-processing and QC for the *Nazor* and  
24 *Fernández-Santiago* datasets was not performed in our lab as no raw data was available.



1

2 *iPSC – motor neuron samples*

3 A dataset comprised of 23 cellular samples with two iPSC samples and 21 derived motor neurons  
4 was generated by our lab, with DNAm quantified using the Illumina EPIC DNAm array (**Table S1**).  
5 These data were QC'd following the pipeline described above.

6

7 *ESC – neuron samples*

8 Two publicly available cellular datasets with NPCs and neurons derived from embryonic stem cells  
9 (ESCs) were downloaded from GEO (*Nazor*, GSE31848, *Kim* GSE38214) [29, 30]. Both datasets consist  
10 of data quantified using the Illumina 450K DNAm array. Pre-processing and QC for both ESC – neuron  
11 datasets were not performed in our lab as no raw data was available.

12

13 *Statistical comparison of cellular states.*

14 The FBC was applied to DNAm data for all cellular samples available. To test for differences in  
15 predicted epigenetic age between cell stages within each dataset, either two sample t-tests or  
16 ANOVA followed by Tukey HSD multiple comparison (when three cell stages were available), were  
17 used. To combine results across all iPSC - neuron datasets, a mixed effects linear model was fitted  
18 with predicted epigenetic age as the dependent variable, a fixed effect for cell stage represented as  
19 two dummy variables contrasting NPCs vs iPSCs and iPSC-neurons vs iPSCs as and a random effect  
20 (i.e. random intercept) for dataset.

21

22 **Results**

23 *Fetal brain clock outperforms existing DNAm clocks at predicting age of prenatal brain samples.*

1 We applied EN regression to genome wide DNAm data from a subset of available prenatal brain  
2 samples (n = 193; **Table S1** and **Figure S1**) to develop the fetal brain clock (FBC). 107 DNAm probes  
3 were assigned non-zero coefficients and therefore were selected as the basis of the FBC (**Table S2**).  
4 We found no overlap in the DNAm sites selected for the FBC and DNAm sites used in the other  
5 established clocks tested in our analysis. Testing the FBC clock in an independent test dataset of fetal  
6 brain samples (**Table S1** and **Figure S1**) to evaluate its performance we found a strong linear  
7 relationship between chronological and predicted prenatal age ( $r = 0.80$ ; **Figure 1A**) with the  
8 majority of samples predicted within 15 days of their actual chronological age (RMSE = 14.84 dpc).  
9 To benchmark the performance of our clock, we compared it to three existing DNAm clocks:  
10 Horvath's MTC [13], Knight's GAC [17] and Lee's CPC [18]. These clocks were selected as they  
11 represent either the most well-established algorithm with the broadest applicability (MTC) or were  
12 specifically developed to predict pre- and perinatal gestational ages, albeit in non-brain tissue (GAC  
13 and CPC). Of note, the MTC only predicted 27 fetal brain samples (41.2%) as prenatal (dpc < 280)  
14 with a low correlation between chronological and predicted age ( $r_{\text{MTC}} = 0.06$ ). This correlation is  
15 much lower than those reported in the original manuscript when Horvath tested the clock in adult  
16 samples [13], highlighting the challenges with extrapolating clocks to samples which were not well  
17 represented in model development. By comparison, the GAC and CPC perform better than the MTC,  
18 although they have smaller correlation coefficients ( $r_{\text{GAC}} = 0.52$  and  $r_{\text{CPC}} = 0.76$ ) and are associated  
19 with a larger error (RMSE<sub>GAC</sub> = 21.32 and RMSE<sub>CPC</sub> = 60.08) than the FBC. Interestingly, while the  
20 predictions from the GAC are more precise, it is not as effective at ranking the samples by age as the  
21 CPC. Taken together, these results demonstrate that our novel FBC outperforms existing clocks at  
22 predicting age in fetal brain samples, and therefore is the optimal tool available to profile the  
23 epigenetic age in models of neuronal development. When applying clocks to the training data, the  
24 three established clocks produce similar correlations and RMSEs as in the testing data. As expected,  
25 the predictions of the FBC in the training data are more accurate than the predictions in the testing  
26 data, reflecting overfitting of the model (**Figure S2**).

1

2 We further tested the FBC in an independent prenatal brain dataset (n = 129, **Table S1**), finding a  
3 stronger linear relationship between chronological age and predicted epigenetic age (r = 0.87, **Figure**  
4 **2A**), than in the test dataset (**Figure 1A**) but a larger error rate (RMSE = 26.36 dpc). On closer  
5 inspection, we observed that this error is mainly driven by a subset of older samples (> 185dpc,  
6 **Figure 2A**) in the validation dataset (**Table S1**), that are older than any of the samples in the training  
7 data (**Figure 2**). If we limit our analysis to the samples whose chronological age overlaps the range of  
8 ages used in the training data (37 - 185 dpc; n = 125) then the error is decreased to 18.94 dpc. The  
9 performance of the established clocks in the validation dataset is also comparable to their  
10 performance in the testing dataset, with smaller correlations and higher error compared to the FBC  
11 and no sample with a predicted prenatal age by the MTC (**Figure 2B-D**).

12

13 Given our previous finding of divergent, sex-specific age trajectories at multiple DNAm sites during  
14 prenatal development [20], we tested whether the FBC performed differently between males and  
15 females in our testing dataset. Although this analysis initially indicated a significant difference in the  
16 correlation with age between males and females ( $P_{\text{sex*Age}} = 0.0007$ ), this relationship is likely driven  
17 by outliers. Indeed, a sensitivity analysis excluding the two samples with youngest and oldest  
18 predicted ages produced a non-significant result ( $P_{\text{sex*Age}} = 0.081$ ). Repeating the analysis in the  
19 validation dataset we find a small significant effect of sex on age in the full dataset ( $P_{\text{sex*Age}} =$   
20  $0.00179$ ), which was driven by the samples older than 185, all of them being female. As samples  
21 older than 185 dpc produce inaccurate predictions, they could unfairly bias the analysis of potential  
22 sex effects and after removing the them from the analysis, there is no longer a significant effect of  
23 sex on the accuracy of the clock ( $P_{\text{sex*Age}} = 0.95$ ).

24

1 *Fetal and gestational age clocks are not able to predict adult ages in adult brain tissue.*

2 All four clocks were additionally tested in an adult brain DNAm dataset (**Figure S3**). As expected, the  
3 FBC performs poorly in this sample set, with all samples predicted as prenatal albeit at the older end  
4 of the spectrum of ages in the training data (range of predicted ages 115-170 dpc). In contrast the  
5 MTC performs the best ( $r_{MTC} = 0.65$ ,  $RMSE_{MTC} = 20.11$  years) as it is the only clock we considered that  
6 was developed using adult samples. As with the FBC, the GAC and CPC fail to produce predictions of  
7 postnatal age, again reflecting the fact that they were also constructed using data from pre- or  
8 perinatal samples.

9

10 *Fetal brain clock captures differences in differentiation of cellular stem cell models towards neurons*

11 Having demonstrated that our novel FBC is the optimal clock to profile age in prenatal brain samples,  
12 we applied it to DNAm data from multiple cellular studies to characterize epigenetic age in iPSCs and  
13 ESCs differentiating towards cortical neurons. All samples were estimated to have a fetal epigenetic  
14 age, regardless of cell stage, cell line origin or differentiation protocol. Furthermore, they were  
15 predicted to have a “young” fetal age (**Figure 3**) with the iPSCs having a mean predicted age of 75.6  
16 dpc (SD = 6.9 dpc; n = 59), the NPCs having a mean age of 79.1 dpc (SD = 11.0 dpc; n = 8) and iPSC -  
17 neurons having a mean predicted age of 83.2 dpc (SD = 8.87 dpc; n = 31). To test whether the  
18 differentiation process had an effect on the epigenetic age predictions from the FBC we compared  
19 the estimated ages between iPSCs and neurons, observing significant differences in all datasets  
20 (**Figure 3A**), with neurons being older than iPSCs. For the *Imm* dataset, which included proliferative  
21 NPCs as well as postmitotic neurons, we additionally found a significant difference between NPCs  
22 and iPSC-neurons ( $\Delta_{mean} = 20.0$  dpc,  $P = 0.00039$ ), but not between iPSCs and NPCs ( $\Delta_{mean} = 10.0$  dpc,  
23  $P = 0.24$ ). In contrast, in the *Nazor* dataset, which only included iPSCs and NPCs, we did find a  
24 significant difference in predicted epigenetic age between iPSCs and NPCs ( $\Delta_{mean} = 10.5$  dpc,  $P =$   
25  $0.00734$ ). Meta-analyzing the data across the five studies including iPSCs and iPSC-derived NPCs and

1 neurons, we found that iPSC-neurons were predicted to have a significantly advanced epigenetic age  
2 compared to iPSCs of about 2 weeks ( $\Delta_{\text{mean}} = 13.35$  dpc,  $P = 2.13\text{e-}11$ ) but no significant difference  
3 was observed between iPSC and NPCs ( $\Delta_{\text{mean}} = 4.33$  dpc,  $P = 0.11$ ).

4

5 As well as cortical neurons, we applied the FBC to DNAm data from a study on iPSCs and  
6 differentiated motor neurons. The motor neurons had a mean predicted epigenetic age of 79.82 dpc  
7 (SD = 6.82 dpc) which is slightly younger than the cortical neurons ( $\text{mean}_{\text{iPSC-neurons}} = 83.2$  dpc). When  
8 comparing the predicted ages between the motor neurons and the iPSCs they were originally  
9 derived from, we did not observe a significant difference ( $\Delta_{\text{mean}} = 2.94$  dpc,  $P = 0.825$ , **Figure 3C**).

10

11 Finally, we tested for effects on epigenetic age through the process of differentiation from  
12 embryonic stem cells (ESCs) to NPCs and neurons, using two publicly available DNAm datasets (**Table**  
13 **S1**). In both datasets we observed a significant increase of predicted epigenetic age from ESC to NPC  
14 (**Figure 3D**). Additionally, in the *Kim* dataset, we were able to compare ESC derived neurons, and  
15 found a significant difference between ESCs and neurons ( $\Delta_{\text{mean}} = 55.42$  dpc,  $P = 0.00015$ , **Figure 3D**)  
16 but no change in epigenetic age from NPC to neuron ( $\Delta_{\text{mean}} = -0.58$  dpc,  $P = 0.95$ ).

## 17 **Discussion**

18 In this study we established a novel epigenetic clock, the fetal brain clock (FBC), to characterize the  
19 earliest stages of human neurodevelopment, and applied it to determine the epigenetic age of iPSCs  
20 and ESCs and their derived NPCs and neurons. Epigenetic clocks have been widely applied, including  
21 for the analysis of both in-vivo and in-vitro models of aging, where they have been shown to  
22 correlate with hallmarks of the aging process [31–34]. However, their application has predominantly  
23 been focused on studies involving adult samples. Given the lack of fetal brain samples in the  
24 development of existing DNAm clocks, prior to this study, there was no optimal method for

1 estimating the age of fetal brain samples from DNAm data, limiting the ability to characterize iPSC-  
2 derived neuronal models or other models of neuronal development. We show that, in two non-  
3 overlapping independent validation datasets, the FBC generates predictions that correlate strongly  
4 with chronological age in prenatal brain samples. Furthermore, it outperforms both a pan-tissue  
5 epigenetic clock (Horvath's MTC), and epigenetic clocks focused on the same developmental stage,  
6 but based on DNAm profiled in different tissues (Knight's GAC and Lee's CPC) [13, 17, 18]. The FBC  
7 outperforms these clocks using both correlation and error statistics (RMSE), indicating that it is not  
8 only better at ranking the samples, but it generates more precise estimates.

9

10 As the FBC was predominantly trained on second trimester brain samples, with some first trimester  
11 samples, it made less accurate predictions when applied to third trimester samples and performed  
12 extremely poorly in adult brain samples. Altogether, this reinforces the findings of previous studies  
13 that have also demonstrated that the applicability of DNAm clocks is dependent on the  
14 characteristics of the data they were trained on, with the tissue and age range of the training samples  
15 of particular relevance [14, 15]. More specifically, we note that while the accuracy of a DNAm clock  
16 is typically decreased in tissues not represented in its training data, clocks are completely limited to  
17 predicting ages represented in the training data. If the true age of a tested sample lies outside of the  
18 age range of the training data, the clock is unable to provide an appropriate prediction with the  
19 magnitude of inaccuracy increasing as the true age of the sample becomes more extreme suggesting  
20 that, in general, age range is more critical than tissue when training a clock.

21

22 Previous epigenetic clocks have shown that the predicted epigenetic age of iPSCs is significantly  
23 lower than the cells from which they are reprogrammed and the chronological age of the donor at  
24 sample donation [13]. The induction of pluripotency reprograms the epigenome, including at the loci  
25 used in the clock algorithm, ultimately leading to a younger predicted epigenetic age. However, in

1 these analyses the predicted ages remain postnatal, which is unexpected as human pluripotent cells  
2 only occur during the early stages of human development and hence we hypothesized that, with an  
3 adequately calibrated clock, iPSCs would be expected to be estimated as being early fetal. Applying  
4 the FBC to five datasets of iPSCs and iPSC-derived NPCs and neurons, we found this to be the case.  
5 iPSCs were estimated as having a mean age of 75.6 dpc, fitting our hypothesis that they represent  
6 first trimester developmental stages. These results align with studies that have reported  
7 rejuvenation effects on the transcriptome, telomeres and mitochondria of iPSCs following  
8 reprogramming [35–37]. In addition, we profiled the effect on predicted epigenetic age following the  
9 differentiation of iPSCs towards neurons reporting a small but significant aging effect of 13 dpc. This  
10 developmental stage coincides with fetal neurogenesis [38] and suggests that while differentiation  
11 does induce an aging process, it does not accelerate iPSC-neurons to a postnatal state. Of note,  
12 Mertens and colleagues found that while iPSCs lose age related transcriptomic signatures, induced  
13 neurons (iNs; neurons directly reprogrammed from fibroblasts) keep their specific aging signatures  
14 [36]. Therefore, it would be interesting to apply our FBC to iNs, iPSCs, iPSC-neurons and their  
15 corresponding somatic tissues to verify whether age associated DNAm differences are also  
16 preserved in iNs. In addition, we tested the FBC on ESC and ESC-derived neurons. Although our  
17 sample size was small, the results also suggested that the differentiation process induced a small  
18 aging effect as the ESCs were differentiated into neurons. Altogether, our results indicate that iPSC-  
19 neurons may have limited utility for the study of age-related brain diseases, like Alzheimer’s disease  
20 or other dementias, as many molecular processes related to an aging phenotype may not be  
21 recapitulated.

22

23 Epigenetic clocks have been utilized for a wide range of applications [34], with a predominant focus  
24 on exploring the biological meaning of deviations between chronological age and epigenetic age. As  
25 we have shown the cause of this deviation may result from the use of an inappropriate clock,

1 therefore the FBC is a critical tool for assessing whether epigenetic age acceleration during  
2 neurodevelopment is associated with later life outcomes such as disease or in utero exposures (such  
3 as maternal smoking). The FBC also has utility for determining the specific developmental stage a  
4 model of neurodevelopment recapitulates (e.g. brain organoids or cellular neuronal models) and  
5 how different exposures or genetic backgrounds may influence neurodevelopmental processes and  
6 aging.

7

8 While a strength of our study is the development of a bespoke clock to optimally profile the  
9 epigenetic age of human fetal brain samples, due to the training data predominantly containing  
10 second trimester samples the FBC is most accurate for this period of neurodevelopment. We are  
11 confident that the FBC has correctly predicted fetal epigenetic ages for the cell lines included in our  
12 analysis as the vast majority of the stem cell models and their derived neurons were less than the  
13 median age in the training data. This indicates that the predictions are not confounded by saturation  
14 of the coefficients. Although we took advantage of previously published data to include all available  
15 samples appropriate for addressing our research questions, some of the group sizes, in particular the  
16 NPCs, were small and we were not powered to detect significant aging effects as a result of  
17 differentiation from iPSCs to NPCs in all datasets. Furthermore, across the different studies there  
18 was variation in the estimated prenatal age of each cell state; we hypothesize that these differences  
19 results from subtle variation in differentiation protocols, timepoints of cell collection or the  
20 definition of NPCs within the respective studies [39]. Despite this, we are confident in the  
21 conclusions we report as these study specific effects were controlled for in our analysis.

22

23 In summary, we demonstrate that established DNAm clocks struggle to capture changes in  
24 epigenetic age during neurodevelopment and for precise predictions a bespoke clock trained on  
25 fetal brain data is required. Using the FBC to assess the epigenetic age of iPSCs and differentiated



1 neurons, we found that iPSCs and derived NPCs and neurons reflect early prenatal developmental  
2 stages. Our findings question the suitability of the iPSC-neurons for the study of aging associated  
3 processes.

4

## 5 **List of abbreviations**

| <b>Abbreviation</b> | <b>Definition</b>                               |
|---------------------|-------------------------------------------------|
| AD                  | Alzheimer's Disease                             |
| BDR                 | Brains for Dementia Research                    |
| CPC                 | Control Placental Clock                         |
| DNA <sub>m</sub>    | DNA methylation                                 |
| dpc                 | Days post-conception                            |
| EN                  | Elastic net                                     |
| ESC                 | Embryonic Stem Cell                             |
| FBC                 | Fetal brain clock                               |
| GA                  | Gestational age                                 |
| GAC                 | Gestation age clock                             |
| GEO                 | Gene Expression Omnibus                         |
| iN                  | Induced neuron                                  |
| iPSC                | Induced pluripotent stem cell                   |
| iPSC-neuron         | iPSC-derived neuron                             |
| LASSO               | Least Absolute Shrinkage and Selection Operator |
| MTC                 | Multi-tissue clock                              |
| NPC                 | Neuronal precursor cell                         |
| QC                  | Quality control                                 |
| RMSE                | Root mean squared error                         |

6

## 7 **Declarations**

8 *Ethical approval*

1 Ethical approval for the collection of human fetal brain tissue acquired from the Human  
2 Developmental Biology Resource was granted by the Royal Free Hospital research ethics committee  
3 under reference 08/H0712/34 and Human Tissue Authority material storage license 12220. Ethical  
4 approval for collection of human fetal brain tissue for the Medical Research Council Brain Bank was  
5 granted under reference 08/MRE09/38. Ethical approval for the work with methylomic data of  
6 human brain tissue from the BDR cohort was granted by the University of Exeter, College of  
7 Medicine and Health Research Ethics Committee under reference Mar20/D/009Δ5. Ethical approval  
8 for the Price cellular samples is as follows: participants were recruited and methods carried out in  
9 accordance to the 'Patient iPSCs for Neurodevelopmental Disorders (PiNDs) study' (REC No  
10 13/LO/1218). Informed consent was obtained from all subjects for participation in the PiNDs study.  
11 Ethical approval for the PiNDs study was provided by the NHS Research Ethics Committee at the  
12 South London and Maudsley (SLaM) NHS R&D Office.

13

14 *Consent for publication*

15 Not applicable

16

17 *Availability of data and materials*

18 Raw and normalized DNAm data for the human fetal brain samples used to test and train the fetal  
19 brain clock have been submitted to the NCBI Gene Expression Omnibus (GEO;  
20 <http://www.ncbi.nlm.nih.gov/geo/>) under accession numbers GSE58885, GSE74193, GSE157908,  
21 GSE116754 and GSE90871. DNAm data for the unpublished fetal brain are available from the  
22 corresponding author on request. DNAm data for the cellular datasets, are also available under  
23 accession numbers GSE158089, GSE105093, GSE51921, GSE31848 and GSE38214. DNAm data for  
24 the cellular dataset *Bhinge* is available from the corresponding author on request. The coefficients of

1 the FBC are included within the article in **Table S2**. The custom R scripts used for this study and to  
2 apply the FBC are available at <https://github.com/LSteg/EpigeneticFetalClock>.

3

#### 4 *Competing interests*

5 The authors declare that they have no competing interests.

6

#### 7 *Funding*

8 This work was supported by a Simons Foundation (SFARI) grant (grant number: 573312) awarded to  
9 JM and a Medical Research Council (MRC) project grant (grant number: MR/R005176/1) to JM. The  
10 human embryonic and fetal material was provided by the Joint MRC Wellcome Trust Human  
11 Developmental Biology Resource (<http://www.hdbr.org>), which is funded by Medical Research  
12 Council grant G0700089 and Wellcome Trust grant GR082557. Adult brain DNAm data was  
13 generated using tissue from the Brains for Dementia Research (BDR) cohort, which is jointly funded  
14 by Alzheimer's Research UK and the Alzheimer's Society in association with the Medical Research  
15 Council. The South West Dementia Brain Bank is part of the Brains for Dementia Research program,  
16 jointly funded by Alzheimer's Research UK and Alzheimer's Society, and is also supported by BRACE  
17 (Bristol Research into Alzheimer's and Care of the Elderly) and the Medical Research Council. The  
18 *Price* cellular data was supported by grants from the European Autism Interventions (EU-AIMS): the  
19 Innovative Medicines Initiative Joint Undertaking under grant agreement no. 115300, resources of  
20 which are composed of financial contribution from the European Union's Seventh Framework  
21 Programme (FP7/2007-2013) and EFPIA companies' in kind contribution (JP, DPS); StemBANCC:  
22 support from the Innovative Medicines Initiative joint undertaking under grant 115439-2, whose  
23 resources are composed of financial contribution from the European Union [FP7/2007-2013] and  
24 EFPIA companies' in-kind contribution (JP, DPS). G.S. was supported by a PhD studentship from the

1 Alzheimer's Society. N.J.B. was supported by the Medical Research Council grant MR/L010674/2.

2 N.D.A. was supported by Medical Research Council grant N013255/1.

3

#### 4 *Authors' contributions*

5 L.C.S, G.L.S. and E.H. designed the work; J.M., E.H., E.L.D., N.J.B, A.B., J.P., D.P.S., N.D.A. and K.L.

6 acquired funding; J.I., J.P.D., R.F., E.L.D., S.C.N., A.R.J., J.B., G.W.A.N., E.M.W., L.W.P., E.L.C., K.M.J.,

7 A.F., G.M., D.P.S., E.P., A.B., N.J.B. and N.D.A acquired and processed samples and data; L.C.S, G.L.S.

8 and E.H analyzed and interpreted data; L.C.S. and E.H. wrote the paper.

9

#### 10 *Acknowledgements*

11 We would like to gratefully acknowledge all donors and their families for the tissue provided for this

12 study. We are grateful to Rosy Watkins, Paulina Nowosiad, Rupert Faraway and Roland Nagy for

13 generation and maintenance of *Price* iPSCs [41, 42].

14

#### 15 **Figure Legends**

16 **Figure 1 The Fetal Brain Clock (FBC) outperforms other DNAm clocks when applied to**

17 **neurodevelopmental samples.** Shown are scatterplots comparing chronological age (x-axis; days

18 post-conception) against (y-axis; days post-conception) predicted epigenetic age calculated using **A**

19 Fetal Brain Clock (FBC), **B** Horvath's multi tissue clock (MTC), **C** Knight's Gestational Age Clock (GAC),

20 and **D** Lee's Control Placental Clock (CPC) in our fetal brain testing dataset (n = 65, age range = 23 –

21 153 dpc). The black line indicates the identity line of chronological and predicted epigenetic age and

22 represents a perfect prediction. Two statistics were calculated to evaluate the precision of each

23 DNAm clock: Pearson's correlation coefficient ( $r$ ) and the root mean squared error (RMSE).

1

2 **Figure 2 Validation of the Fetal Brain Clock in an independent fetal brain dataset.** Shown are  
3 scatterplots comparing chronological age (x-axis; days post-conception (dpc)) against (y-axis; dpc)  
4 predicted epigenetic age calculated using **A** Fetal Brain Clock (FBC), **B** Horvath's Multi Tissue Clock  
5 (MTC), **C** Knight's Gestational Age Clock (GAC), and **D** Lee's Control Placental Clock (CPC) on data  
6 from an independent validation dataset (n = 129, age range = 42 - 280). Two statistics were  
7 calculated to evaluate the precision of each DNAm clock: Pearson's correlation coefficient (r) and the  
8 root mean squared error (RMSE). The dashed line in **A** indicates 185 dpc, which is the highest  
9 available age in the training dataset of the FBC.

10

11

12 **Figure 3 Comparisons of predicted epigenetic age using the fetal brain clock between cellular**  
13 **models throughout differentiation states.** **A** Boxplots comparing the distribution of predicted  
14 epigenetic age (days post-conception) in iPSCs and their derived NPCs and neurons, where each  
15 panel represents a different dataset. P values of Tukey HSD corrected ANOVA for the *Imm* dataset  
16 and two-sample t-tests for *Price*, *Fernández-Santiago* and *Sultanov* datasets are given. F. -S. =  
17 *Fernández-Santiago*. **B** Boxplots of predicted epigenetic age calculated using the FBC where samples  
18 are grouped by cell stage (n = 82, 30 iPSCs, 4 NPCs, 48 iPSC-neurons) and colored by dataset. P  
19 values from mixed effects model are given for differences between iPSCs and NPCs (non-significant)  
20 and iPSC and neurons. **C** Boxplots comparing the predicted epigenetic age in a cohort with iPSCs and  
21 derived motor neurons. P values of two-sample t-test are given. **D** Boxplots of predicted epigenetic  
22 age by FBC applied on two datasets including ESCs and their derived NPCs and neurons. P values of  
23 Tukey HSD corrected ANOVA for the *Kim* dataset and two-sample t-tests for the *Nazor* dataset are  
24 given

25

1 **Additional Files**

2 **Additional File 1: Table S1 Summary of fetal, adult and cellular datasets.**

3

4 **Additional File 2: Table S2 Intercept and coefficients of the fetal brain clock.**

5

6 **Additional File 3: Figure S1 Histogram of age distribution.** Chronological age of the fetal samples  
7 measured in days post-conception in A) training data, B) testing data and C) validation data.

8

9 **Additional File 4: Figure S2 Comparison of predictions from the four DNAm clocks in the training**  
10 **data (n = 193).** Shown are scatterplots comparing chronological age (x-axis) against age (y-axis)  
11 predicted epigenetic age for **A** Fetal Brain Clock (FBC); **B** Horvath's Multi Tissue Clock (MTC); **C**  
12 Knight's Gestational Age Clock (GAC); **D** Lee's Control Placental Clock (CPC) in the data used for  
13 training of the FBC. Where necessary, predicted age was converted to days post-conception. The  
14 black line indicates the identity line of chronological and predicted epigenetic age and represents a  
15 perfect prediction. Two statistics were calculated to evaluate the precision of each DNAm clock:  
16 Pearson's correlation coefficient ( $r$ ) and the root mean squared error (RMSE).

17

18 **Additional File 5: Figure S3 Comparison of predictions from the four DNAm clocks in adult brain**  
19 **samples (n = 1221).** Shown are scatterplots comparing chronological age (x-axis) against (y-axis)  
20 predicted epigenetic age calculated using **A** Fetal Brain Clock (FBC); **B** Horvath's multi tissue clock  
21 (MTC); **C** Knight's Gestational Age Clock (GAC); **D** Lee's Control Placental Clock (CPC) in an  
22 independent adult brain dataset. Where necessary, predicted age was converted to years, where 0  
23 indicates birth. The black line indicates the identity line of chronological and predicted epigenetic  
24 age and represents a perfect prediction. Two statistics were calculated to evaluate the precision of  
25 each DNAm clock: Pearson's correlation coefficient ( $r$ ) and the root mean squared error (RMSE).

26

## 1 References

- 2 1. Takahashi K, Tanabe K, Ohnuki M, Narita M, Ichisaka T, Tomoda K, Yamanaka S (2007)  
3 Induction of Pluripotent Stem Cells from Adult Human Fibroblasts by Defined Factors. *Cell*  
4 131:861–872
- 5 2. Telezhkin V, Schnell C, Yarova P, et al (2016) Forced cell cycle exit and modulation of GABA A ,  
6 CREB, and GSK3 $\beta$  signaling promote functional maturation of induced pluripotent stem cell-  
7 derived neurons. *Am J Physiol Physiol* 310:C520–C541
- 8 3. Fernández-Santiago R, Carballo-Carbajal I, Castellano G, et al (2015) Aberrant epigenome in  
9 iPSC -derived dopaminergic neurons from Parkinson’s disease patients. *EMBO Mol Med*  
10 7:1529–1546
- 11 4. Sultanov R, Lebedeva O, Arapidi G, Lagarkova M, Kiselev S (2018) Methylation profile of  
12 induced pluripotent stem cells generated by integration and integration-free approaches.  
13 *Data Br* 17:662–666
- 14 5. Gordon J, Amini S, White MK (2013) General overview of neuronal cell culture. *Methods Mol*  
15 *Biol* 1078:1–8
- 16 6. Arber C, Lovejoy C, Wray S (2017) Stem cell models of Alzheimer’s disease: Progress and  
17 challenges. *Alzheimer’s Res Ther.* <https://doi.org/10.1186/s13195-017-0268-4>
- 18 7. Morgani S, Nichols J, Hadjantonakis AK (2017) The many faces of Pluripotency: In vitro  
19 adaptations of a continuum of in vivo states. *BMC Dev Biol* 17:1–20
- 20 8. Monk D, Mackay DJG, Eggermann T, Maher ER, Riccio A (2019) Genomic imprinting disorders:  
21 lessons on how genome, epigenome and environment interact. *Nat Rev Genet* 20:235–248
- 22 9. Zeng Y, Chen T (2019) DNA methylation reprogramming during mammalian development.  
23 *Genes (Basel)*. <https://doi.org/10.3390/genes10040257>
- 24 10. Smith ZD, Meissner A (2013) DNA methylation: Roles in mammalian development. *Nat Rev*  
25 *Genet* 14:204–220
- 26 11. Levine ME, Lu AT, Quach A, et al (2018) An epigenetic biomarker of aging for lifespan and  
27 healthspan. *Aging (Albany NY)* 10:573–591
- 28 12. Hillary RF, Stevenson AJ, McCartney DL, et al (2020) Epigenetic measures of ageing predict  
29 the prevalence and incidence of leading causes of death and disease burden. *Clin Epigenetics*  
30 12:115
- 31 13. Horvath S (2013) DNA methylation age of human tissues and cell types. *Genome Biol.*  
32 <https://doi.org/10.1186/gb-2013-14-10-r115>
- 33 14. Shireby G, Davies J, Francis P, et al (2020) Recalibrating the Epigenetic Clock: Implications for  
34 Assessing Biological Age in the Human Cortex. *bioRxiv* 2020.04.27.063719
- 35 15. El Khoury LY, Gorrie-Stone T, Smart M, et al (2019) Systematic underestimation of the  
36 epigenetic clock and age acceleration in older subjects. *Genome Biol* 20:283
- 37 16. Zhang Q, Vallerga CL, Walker RM, et al (2019) Improved precision of epigenetic clock  
38 estimates across tissues and its implication for biological ageing. *Genome Med* 11:54
- 39 17. Knight AK, Craig JM, Theda C, et al (2016) An epigenetic clock for gestational age at birth  
40 based on blood methylation data. *Genome Biol* 17:1–11

- 1 18. Lee Y, Choufani S, Weksberg R, et al (2019) Placental epigenetic clocks: Estimating gestational  
2 age using placental DNA methylation levels. *Aging (Albany NY)* 11:4238–4253
- 3 19. R Development Core Team (2012) R: A Language and Environment for Statistical Computing.
- 4 20. Spiers H, Hannon E, Schalkwyk LC, Smith R, Wong CCY, O'Donovan MC, Bray NJ, Mill J (2015)  
5 Methylomic trajectories across human fetal brain development. *Genome Res* 25:338–352
- 6 21. Jaffe AE, Gao Y, Deep-Soboslay A, Tao R, Hyde TM, Weinberger DR, Kleinman JE (2015)  
7 Mapping DNA methylation across development, genotype and schizophrenia in the human  
8 frontal cortex. *Nat Neurosci* 19:40–47
- 9 22. Pidsley R, Y Wong CC, Volta M, Lunnon K, Mill J, Schalkwyk LC (2013) A data-driven approach  
10 to preprocessing Illumina 450K methylation array data. *BMC Genomics*.  
11 <https://doi.org/10.1186/1471-2164-14-293>
- 12 23. Gorrie-Stone TJ, Smart MC, Saffari A, Malki K, Hannon E, Burrage J, Mill J, Kumari M,  
13 Schalkwyk LC (2019) Bigmelon: Tools for analysing large DNA methylation datasets.  
14 *Bioinformatics* 35:981–986
- 15 24. Chen YA, Lemire M, Choufani S, Butcher DT, Grafodatskaya D, Zanke BW, Gallinger S, Hudson  
16 TJ, Weksberg R (2013) Discovery of cross-reactive probes and polymorphic CpGs in the  
17 Illumina Infinium HumanMethylation450 microarray. *Epigenetics* 8:203–209
- 18 25. Zou H, Hastie T (2005) Regularization and variable selection via the elastic net. *J R Stat Soc Ser*  
19 *B Stat Methodol* 67:301–320
- 20 26. Friedman J, Hastie T, Tibshirani R (2010) Regularization paths for generalized linear models  
21 via coordinate descent. *J Stat Softw* 33:1–22
- 22 27. Chatterton Z, Hartley BJ, Seok MH, et al (2017) In utero exposure to maternal smoking is  
23 associated with DNA methylation alterations and reduced neuronal content in the developing  
24 fetal brain. *Epigenetics and Chromatin*. <https://doi.org/10.1186/s13072-017-0111-y>
- 25 28. Colunga T, Hayworth M, Kreß S, et al (2019) Human Pluripotent Stem Cell-Derived  
26 Multipotent Vascular Progenitors of the Mesothelium Lineage Have Utility in Tissue  
27 Engineering and Repair. *Cell Rep* 26:2566-2579.e10
- 28 29. Nazor KL, Altun G, Lynch C, et al (2012) Recurrent variations in DNA methylation in human  
29 pluripotent stem cells and their differentiated derivatives. *Cell Stem Cell* 10:620–634
- 30 30. Kim M, Park YK, Kang TW, et al (2014) Dynamic changes in DNA methylation and  
31 hydroxymethylation when hES cells undergo differentiation toward a neuronal lineage. *Hum*  
32 *Mol Genet* 23:657–667
- 33 31. Liu Z, Leung D, Thrush K, Zhao W, Ratliff S, Tanaka T, Schmitz LL, Smith JA, Ferrucci L, Levine  
34 ME (2020) Underlying features of epigenetic aging clocks in vivo and in vitro. *Aging Cell*  
35 19:e13229
- 36 32. Horvath S, Raj K (2018) DNA methylation-based biomarkers and the epigenetic clock theory  
37 of ageing. *Nat Rev Genet* 19:371–384
- 38 33. Wagner W (2019) The link between epigenetic clocks for aging and senescence. *Front Genet*.  
39 <https://doi.org/10.3389/fgene.2019.00303>
- 40 34. Ryan CP (2020) “Epigenetic clocks”: Theory and applications in human biology. *Am J Hum Biol*  
41 e23488



- 1 35. Suhr ST, Chang EA, Tjong J, Alcasid N, Perkins GA, Goissis MD, Ellisman MH, Perez GI, Cibelli JB  
2 (2010) Mitochondrial Rejuvenation After Induced Pluripotency. *PLoS One*.  
3 <https://doi.org/10.1371/journal.pone.0014095>
- 4 36. Mertens J, Paquola ACM, Ku M, et al (2015) Directly Reprogrammed Human Neurons Retain  
5 Aging-Associated Transcriptomic Signatures and Reveal Age-Related Nucleocytoplasmic  
6 Defects. *Cell Stem Cell* 17:705–718
- 7 37. Lapasset L, Milhavel O, Prieur A, et al (2011) Rejuvenating senescent and centenarian human  
8 cells by reprogramming through the pluripotent state. *Genes Dev* 25:2248–2253
- 9 38. Lui JH, Hansen D V., Kriegstein AR (2011) Development and evolution of the human  
10 neocortex. *Cell* 146:18–36
- 11 39. Mattis VB, Tom C, Akimov S, et al (2014) HD iPSC-derived neural progenitors accumulate in  
12 culture and are susceptible to BDNF withdrawal due to glutamate toxicity. *Hum Mol Genet*  
13 24:3257–3271
- 14 40. Bhinge A, Namboori SC, Zhang X, VanDongen AMJ, Stanton LW (2017) Genetic Correction of  
15 SOD1 Mutant iPSCs Reveals ERK and JNK Activated AP1 as a Driver of Neurodegeneration in  
16 Amyotrophic Lateral Sclerosis. *Stem Cell Reports* 8:856–869
- 17 41. Cocks G, Curran S, Gami P, et al (2014) The utility of patient specific induced pluripotent stem  
18 cells for the modelling of Autistic Spectrum Disorders. *Psychopharmacology (Berl)* 231:1079–  
19 1088
- 20 42. Warre-Cornish K, Perfect L, Nagy R, et al (2020) Interferon- $\gamma$  signaling in human iPSC-derived  
21 neurons recapitulates neurodevelopmental disorder phenotypes. *Sci Adv* 6:eaay9506

22

23

**A FBC**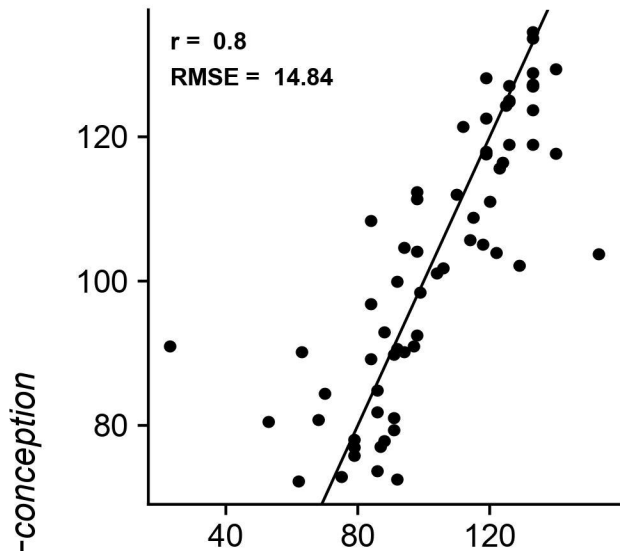**B MTC**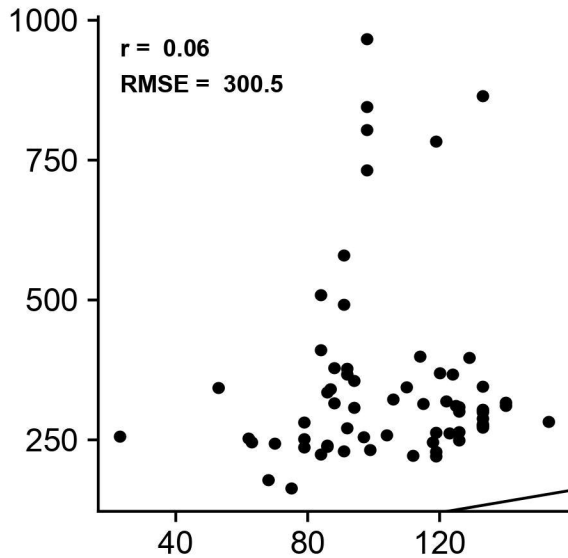**C GAC**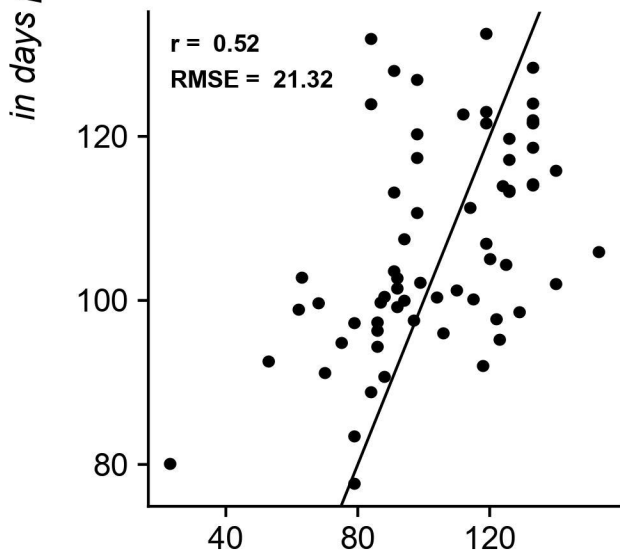**D CPC**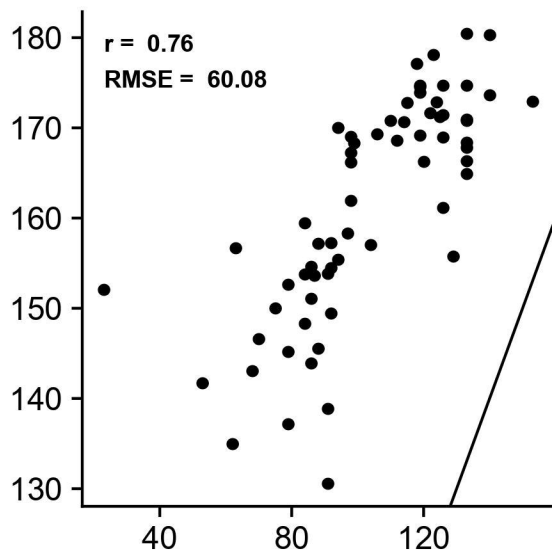

Predicted Age  
*in days post-conception*

Chronological Age  
*in days post-conception*

**A FBC**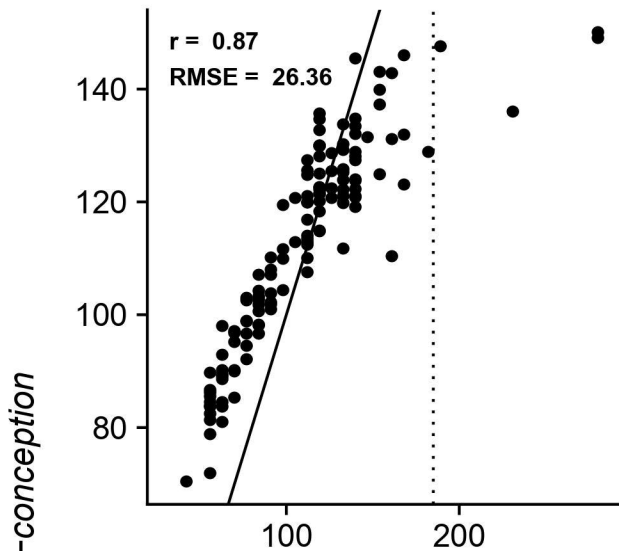**B MTC**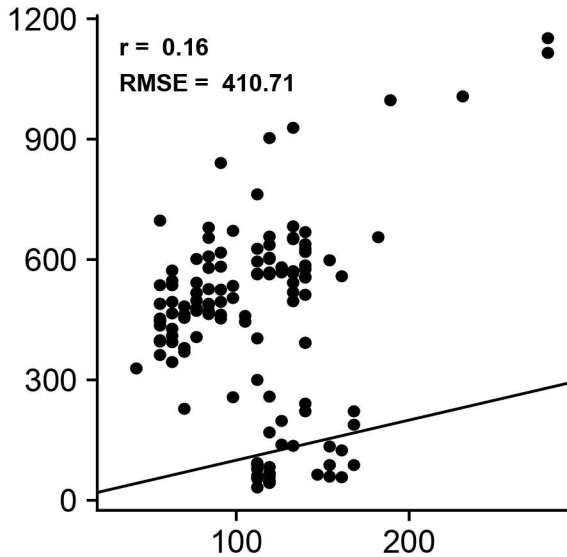**C GAC**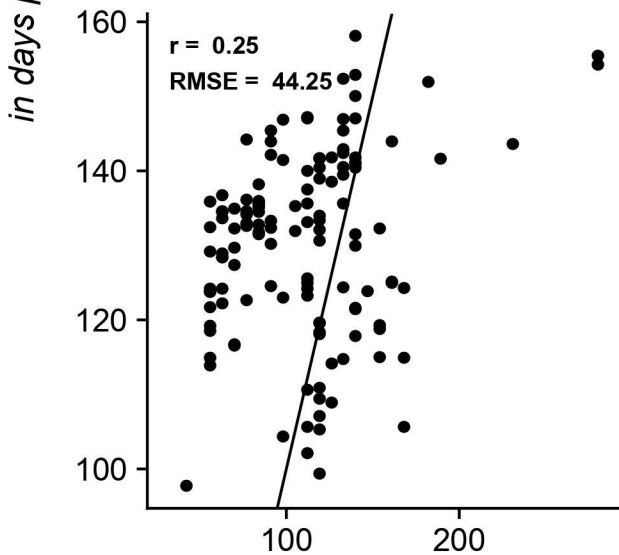**D CPC**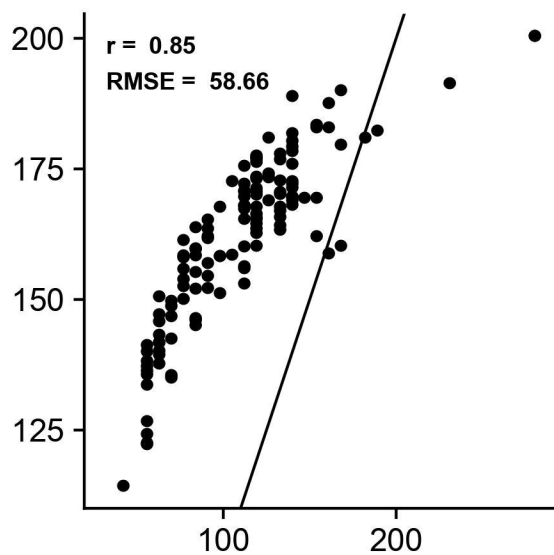**Chronological Age***in days post-conception***Predicted Age***in days post-conception*

## A iPSC - Neuron Datasets

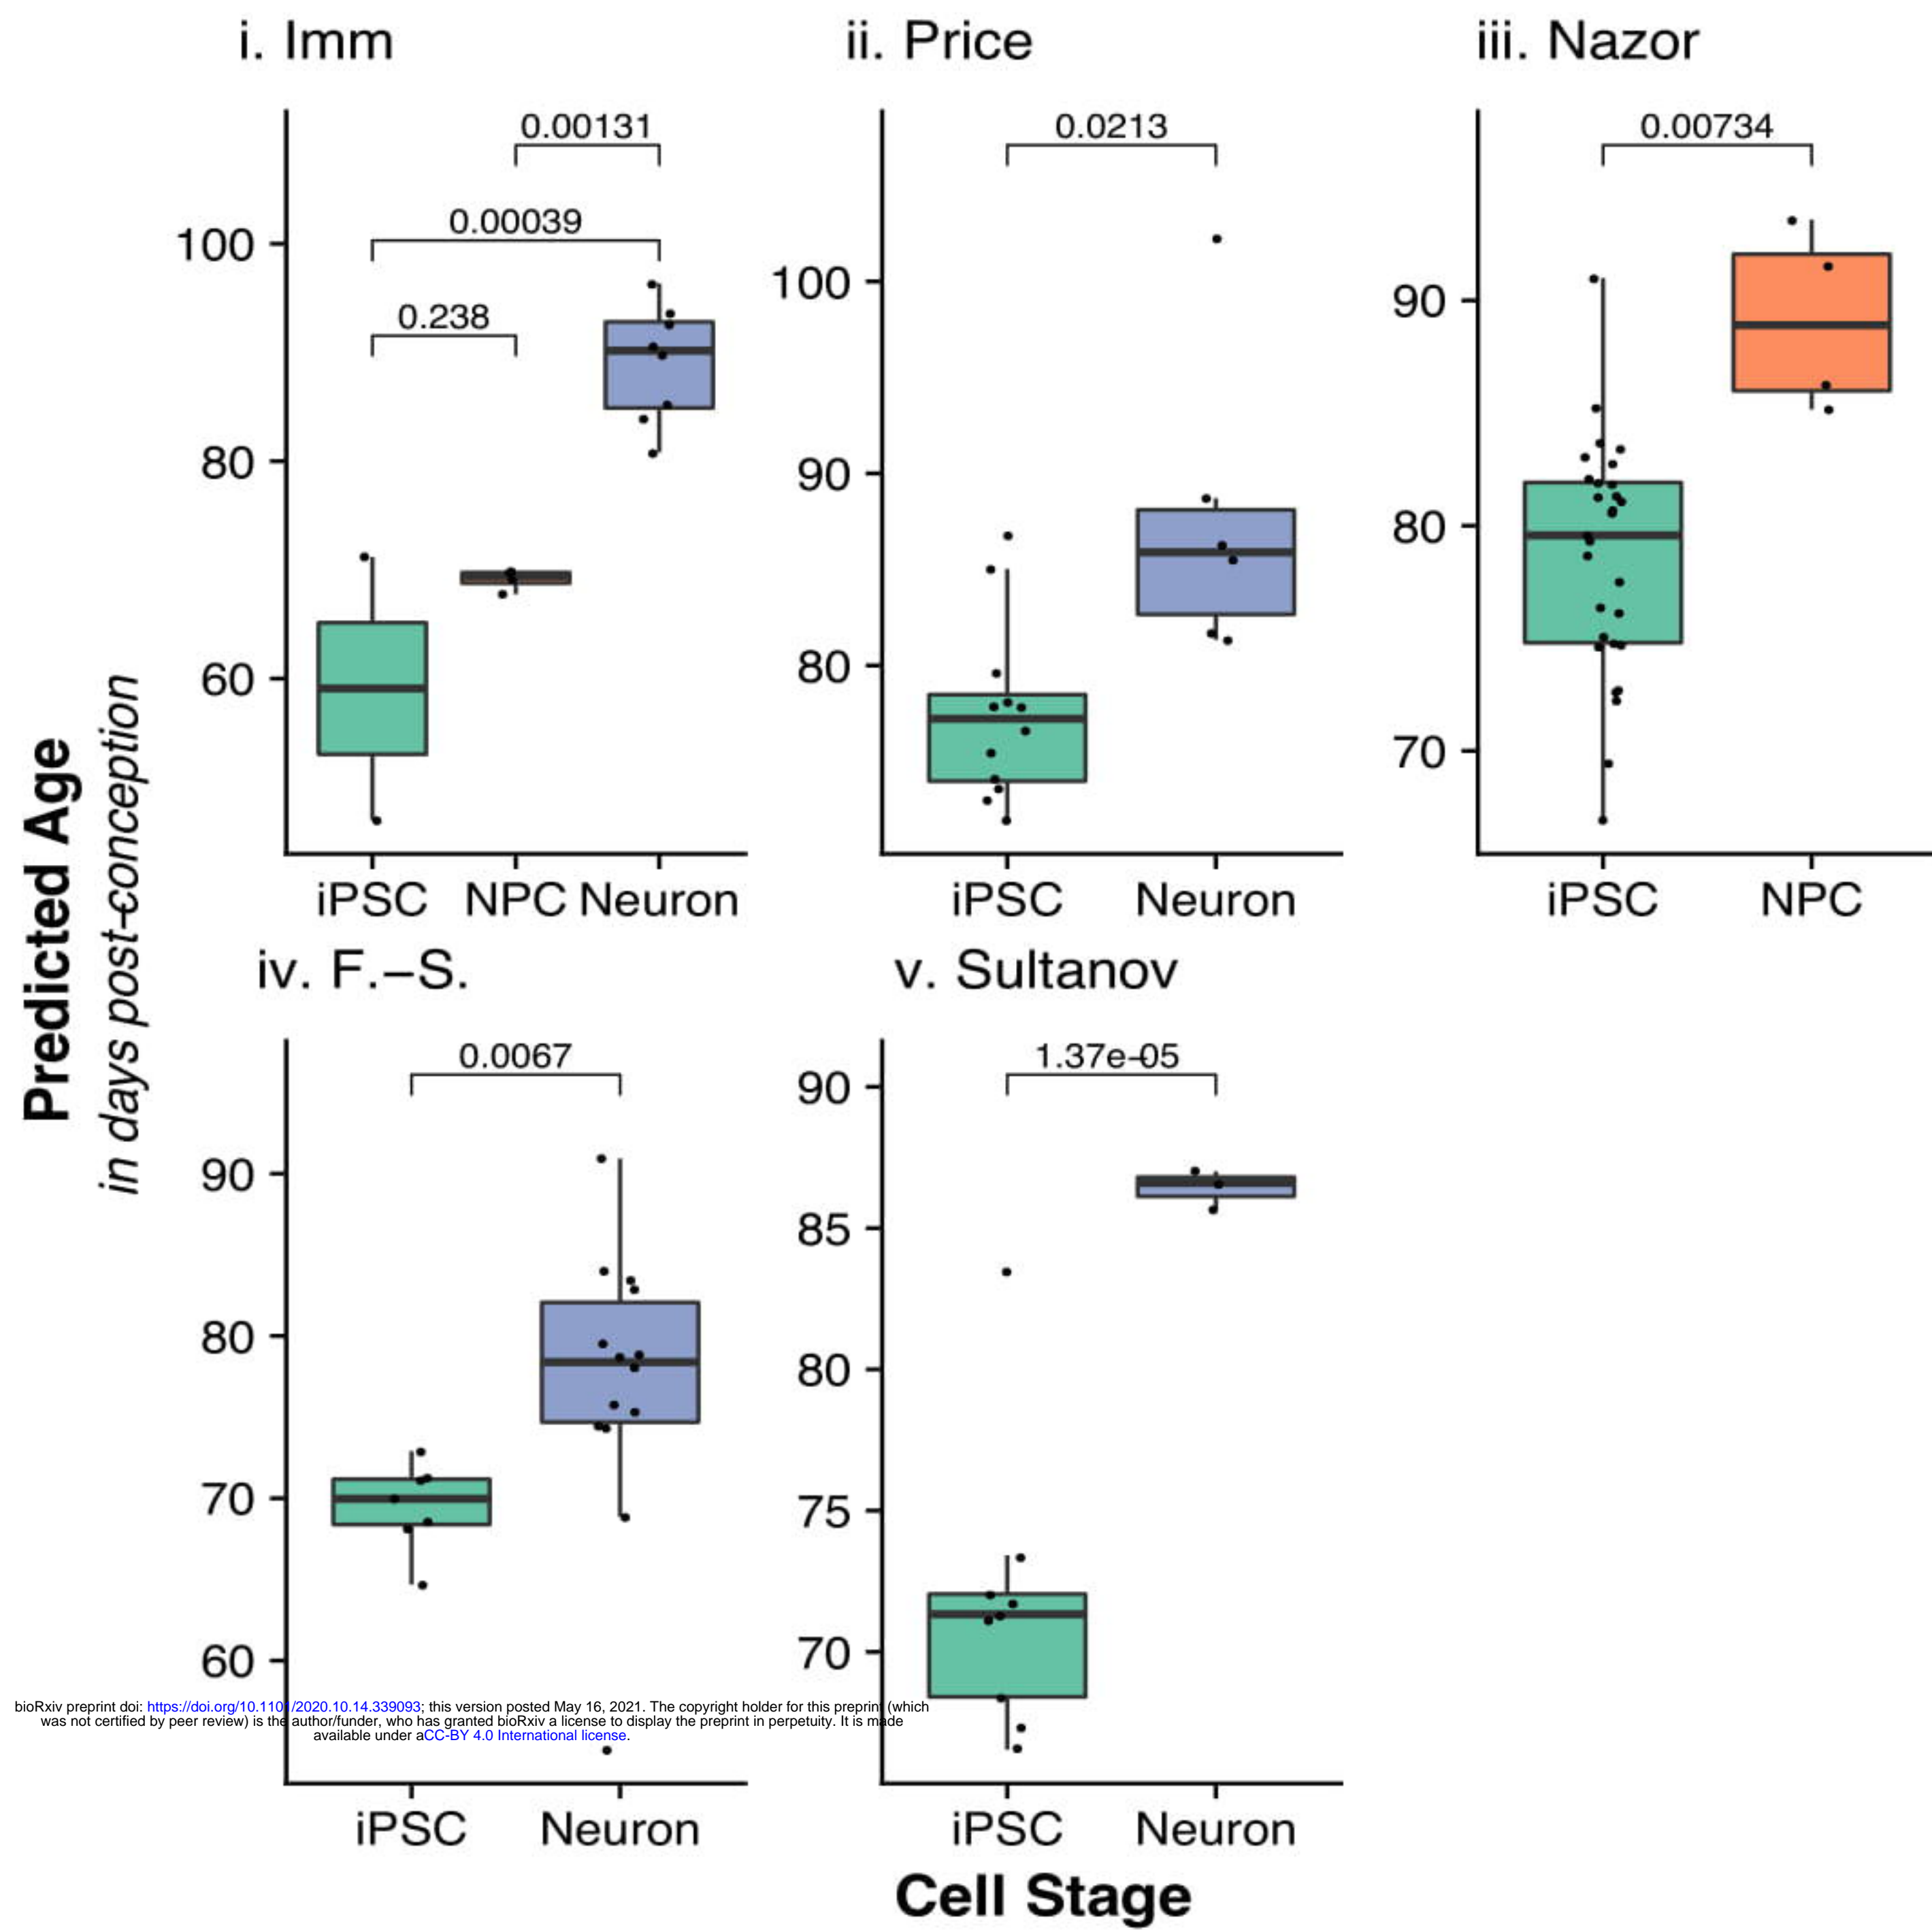

## B iPSC - Neuron Merged

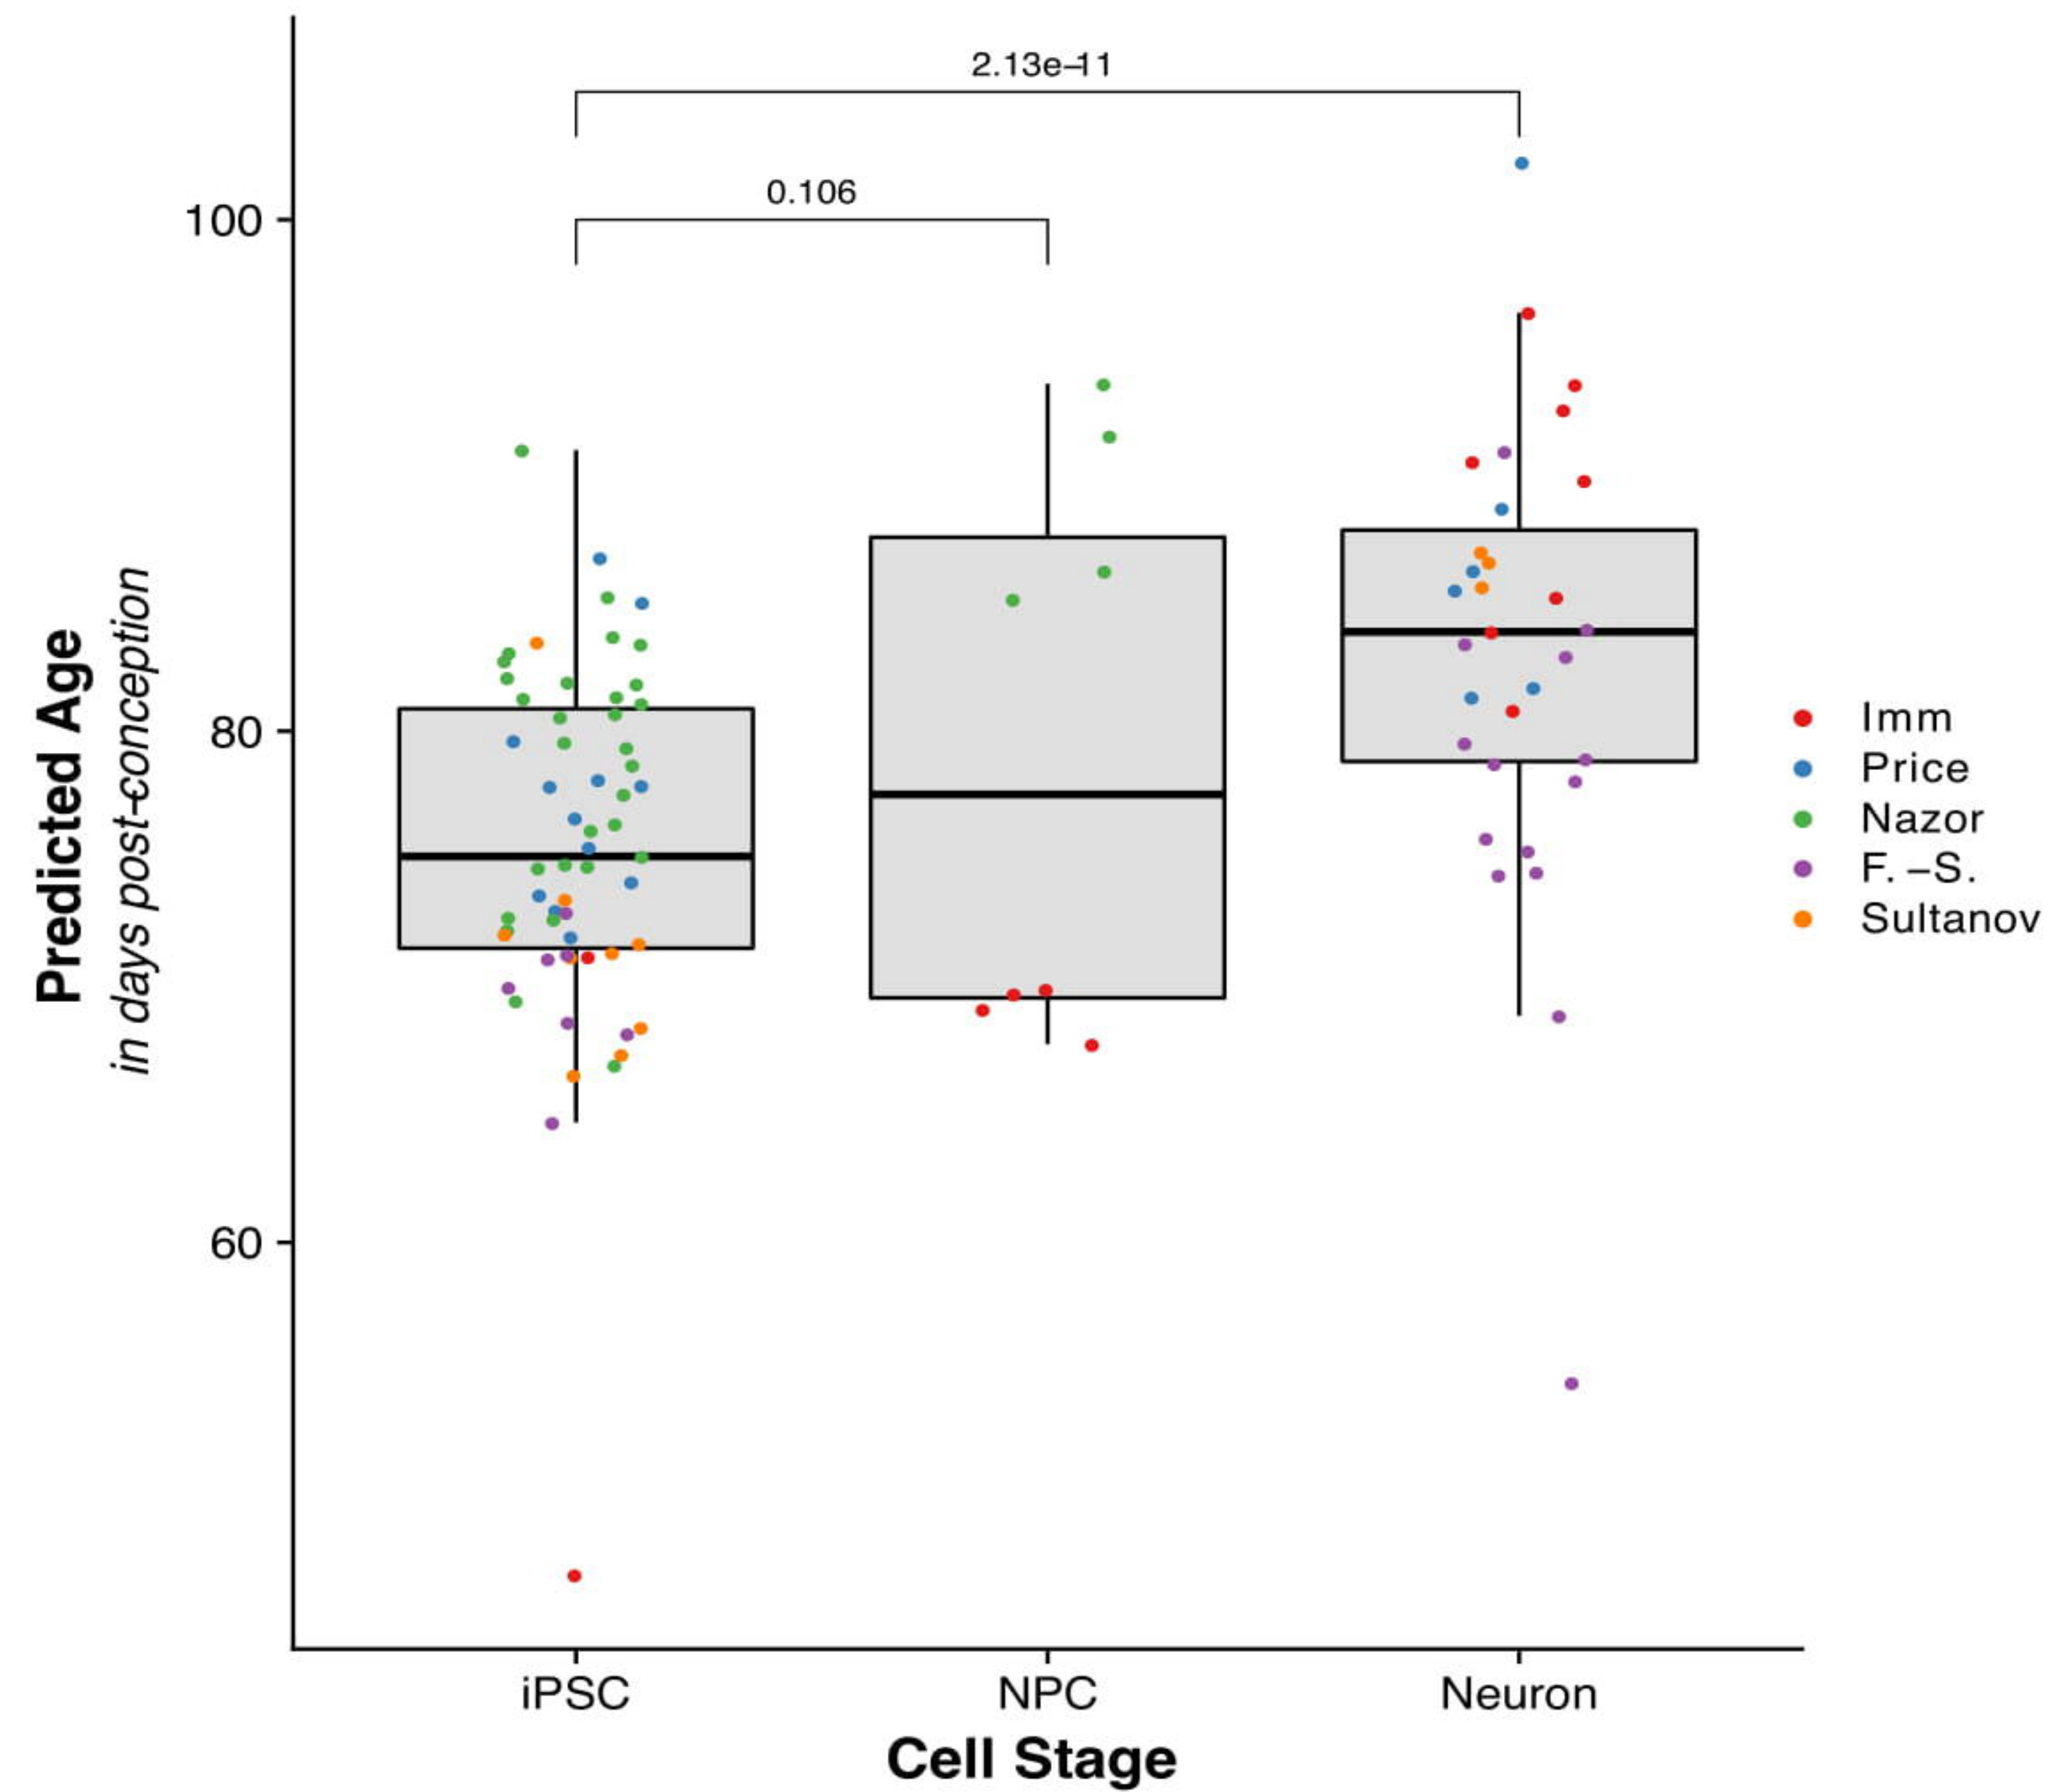

## C iPSC - Motor neuron

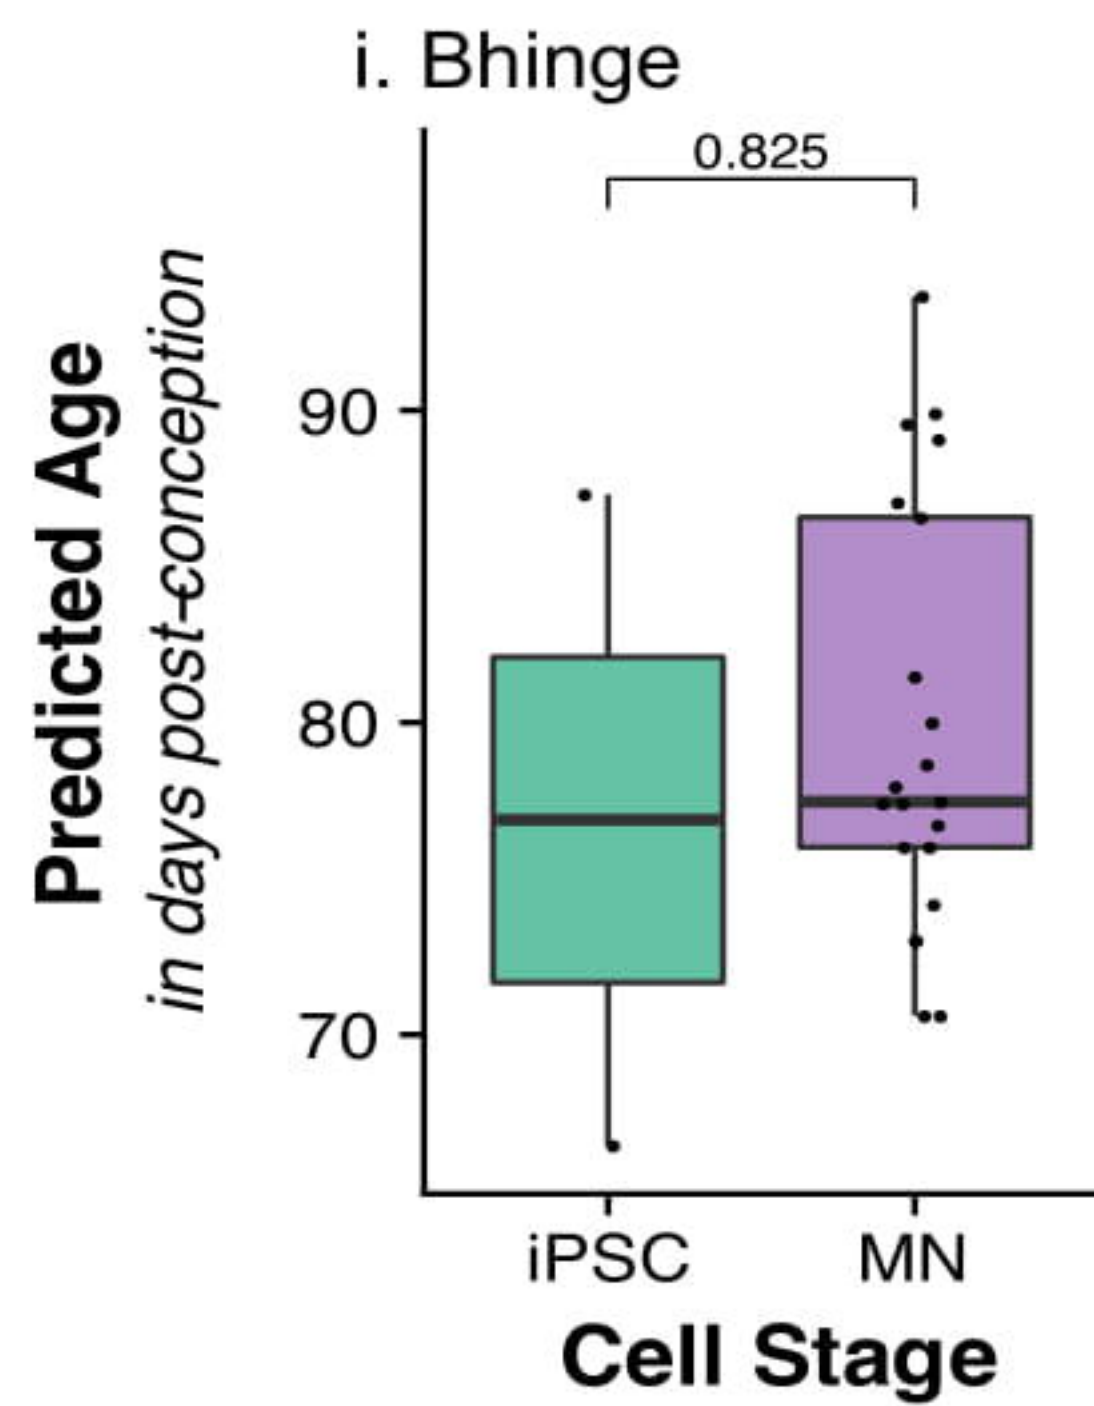

## D ESC - Neuron

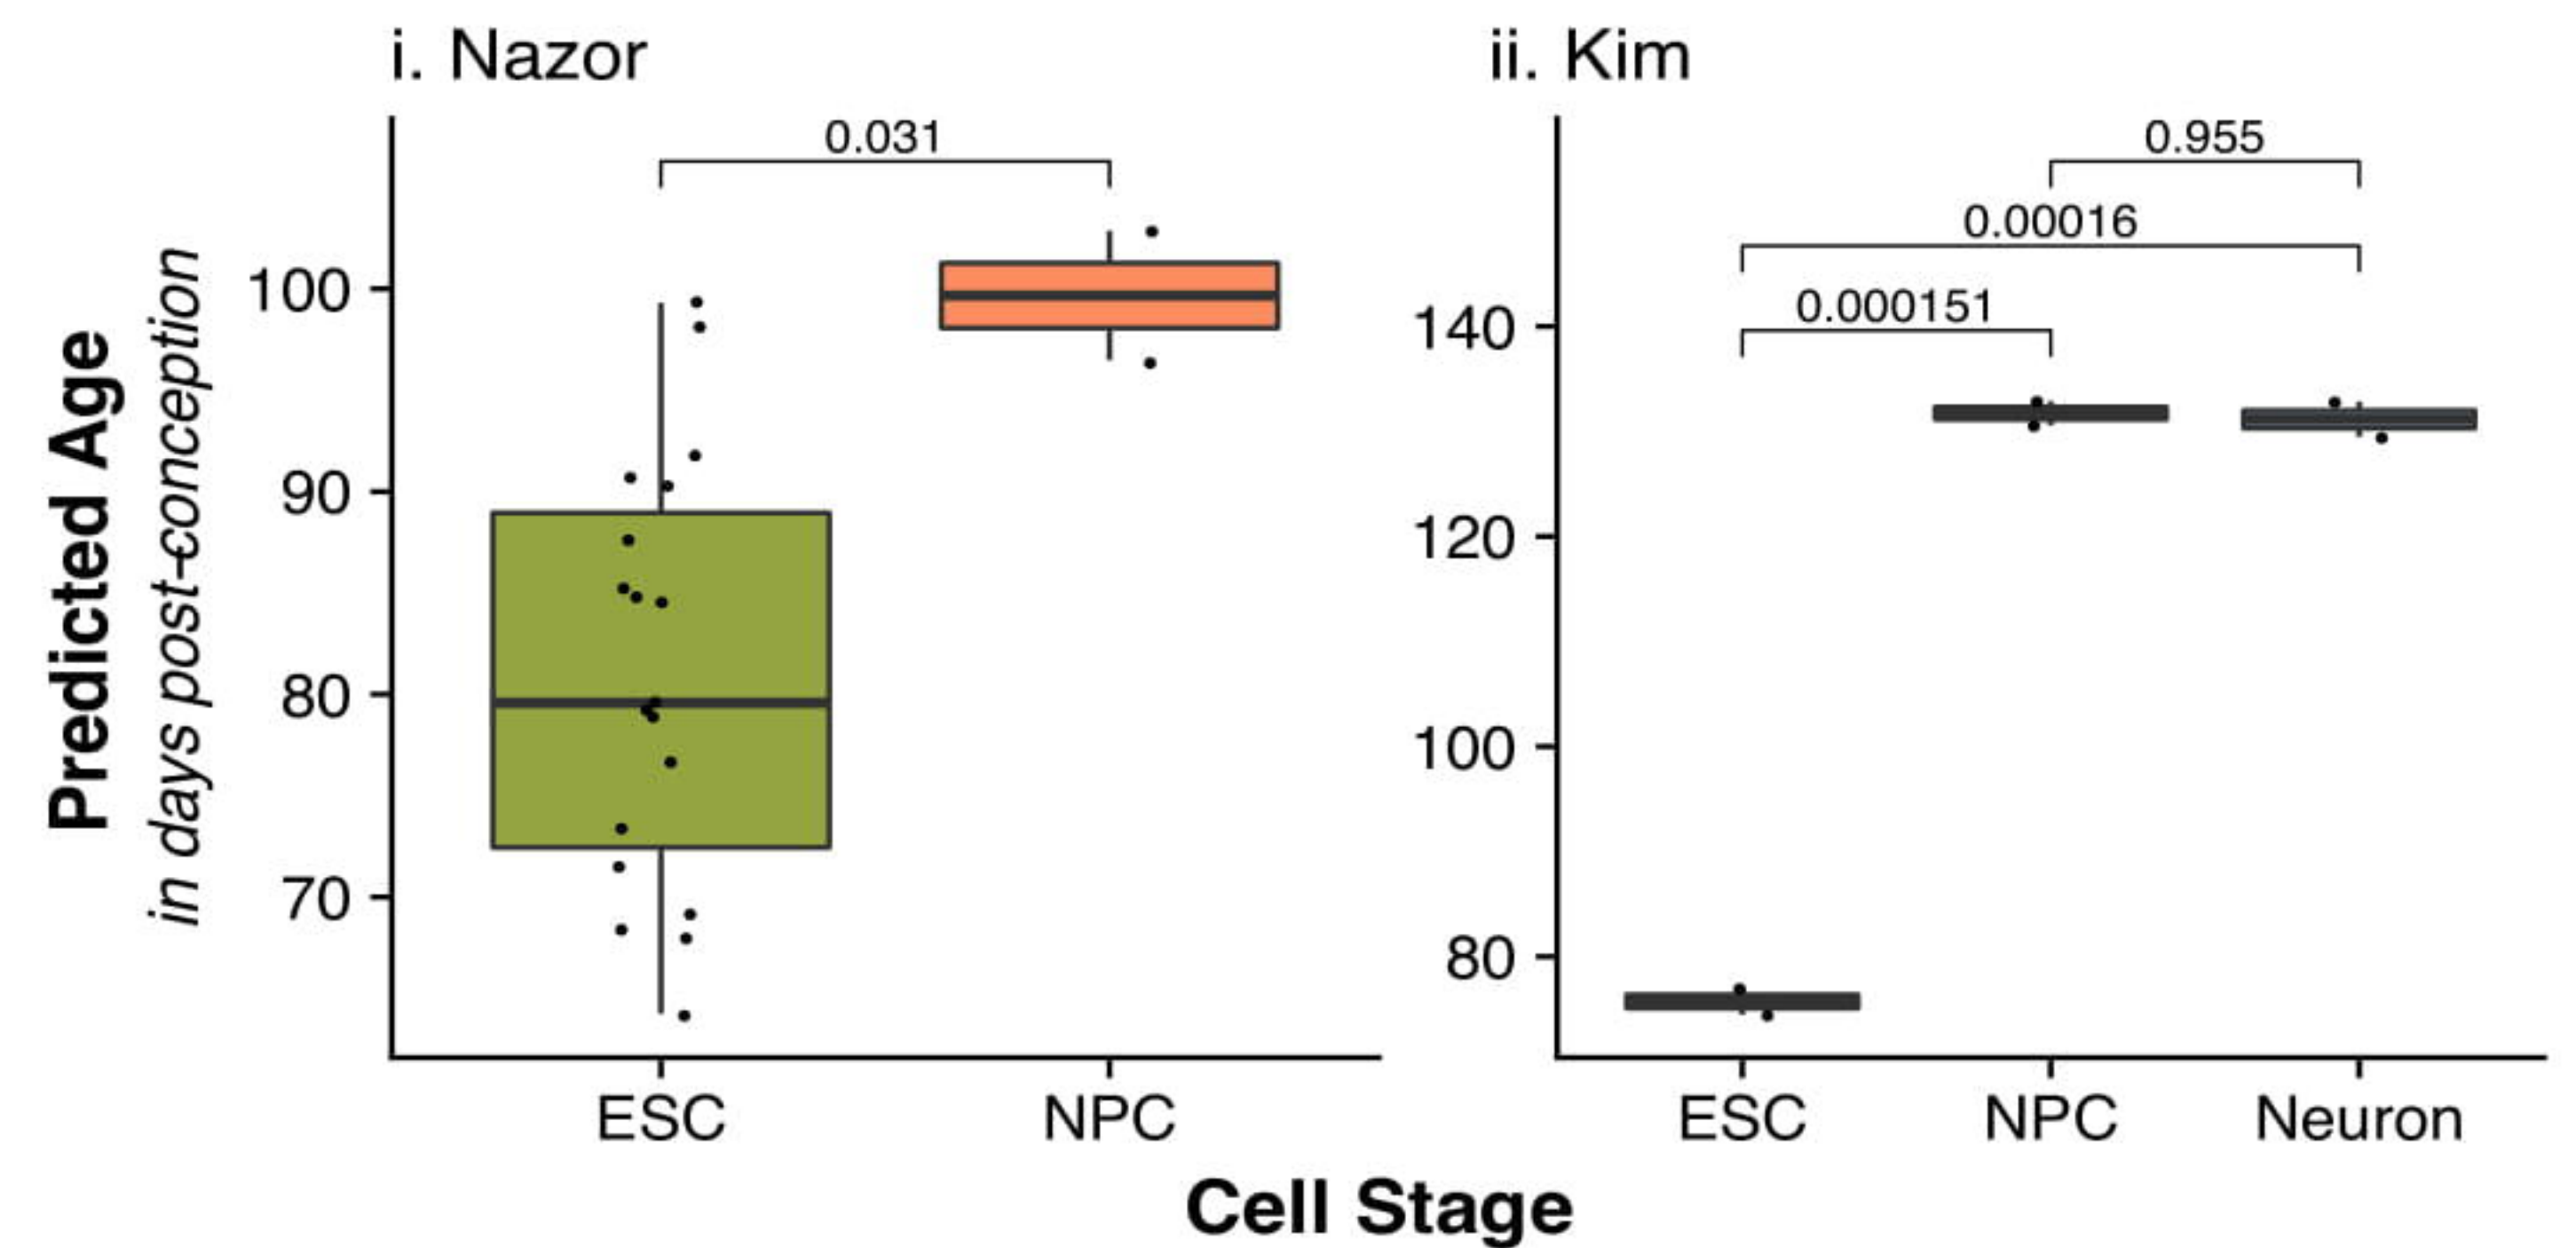

Source: https://www.biorxiv.org/content/biorxiv/early/2021/05/16/2020.10.14.339093.full.pdf
